# Supplementary material for: Retrospectively modeling the effects of increased global vaccine sharing on the COVID-19 pandemic
Source: PubMed Central journal article supplement (PMC9671807; doi:10.1038/s41591-022-02064-y), 2022-10-27
Supplement: 41591_2022_2064_MOESM1_ESM.pdf [file 41591_2022_2064_MOESM1_ESM.pdf]

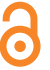

---

# Retrospectively modeling the effects of increased global vaccine sharing on the COVID-19 pandemic

---

In the format provided by the authors and unedited

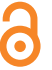

---

# Retrospectively modeling the effects of increased global vaccine sharing on the COVID-19 pandemic

---

In the format provided by the authors and unedited

---

# Supplementary Information: Retrospectively modelling the effects of increased global vaccine sharing on the COVID-19 pandemic

Sam Moore<sup>\*12</sup>, Edward M. Hill<sup>12</sup>, Louise Dyson<sup>12</sup>, Michael J. Tildesley<sup>12</sup>, Matt J. Keeling<sup>12</sup>.

1. The Zeeman Institute for Systems Biology & Infectious Disease Epidemiology Research, School of Life Sciences and Mathematics Institute, University of Warwick, Coventry, CV4 7AL, United Kingdom.

2. Joint UNiversities Pandemic and Epidemiological Research.

\* Corresponding Author. Email: Samuel.E.Moore@warwick.ac.uk

## 1 Data for central scenarios

In tables S1, S2, S3 and S4, we present data for the central vaccine sharing scenarios, as presented in the main manuscript.

| Region               | Strategy         | Infections averted (millions) |                          | Mortalities averted (thousands) |                          |
|----------------------|------------------|-------------------------------|--------------------------|---------------------------------|--------------------------|
|                      |                  | unchanged behaviour           | adapted behaviour        | unchanged behaviour             | adapted behaviour        |
| World                | 2 dose threshold | 8.3 (5.9 – 12.0)              | 12.0 (9.5 – 14.1)        | 27.2 (24.8 – 31.9)              | 28.8 (24.4 – 31.8)       |
|                      | 40+ threshold    | -66.6 (-76.1 – -55.1)         | 123.4 (107.9 – 135.7)    | 113.9 (89.3 – 141.2)            | 269.5 (248.3 – 299.0)    |
|                      | 65+ threshold    | 67.2 (44.5 – 99.3)            | 492.3 (452.2 – 561.4)    | 864.2 (786.6 – 942.0)           | 1306.4 (1203.3 – 1419.8) |
|                      | Full sharing     | 295.8 (221.0 – 408.4)         | 1467.7 (1368.3 – 1531.5) | 1337.7 (1145.3 – 1494.3)        | 3727.7 (3262.4 – 3959.8) |
| Low income           | 2 dose threshold | 1.6 (1.2 – 2.3)               | 1.7 (1.2 – 2.2)          | 4.1 (3.4 – 4.7)                 | 4.1 (3.3 – 4.6)          |
|                      | 40+ threshold    | 12.8 (10.5 – 15.7)            | 14.2 (11.5 – 17.5)       | 35.7 (31.1 – 39.9)              | 35.7 (31.3 – 39.9)       |
|                      | 65+ threshold    | 60.7 (55.1 – 69.5)            | 97.5 (89.5 – 105.3)      | 107.0 (94.5 – 124.9)            | 119.5 (107.7 – 141.0)    |
|                      | Full sharing     | 103.8 (97.0 – 112.0)          | 164.1 (140.1 – 180.6)    | 153.2 (138.7 – 175.5)           | 199.4 (176.1 – 230.6)    |
| Lower middle income  | 2 dose threshold | 4.4 (3.5 – 5.8)               | 4.7 (3.9 – 5.9)          | 16.5 (15.1 – 19.0)              | 16.4 (13.9 – 17.9)       |
|                      | 40+ threshold    | 32.1 (27.9 – 36.5)            | 36.7 (31.4 – 41.2)       | 119.3 (108.6 – 132.7)           | 118.4 (109.1 – 135.3)    |
|                      | 65+ threshold    | 127.2 (120.1 – 140.2)         | 169.4 (151.8 – 207.8)    | 595.5 (554.7 – 651.0)           | 639.2 (593.1 – 690.9)    |
|                      | Full sharing     | 231.0 (210.5 – 261.3)         | 728.9 (647.5 – 792.6)    | 1088.1 (1005.5 – 1190.5)        | 1994.9 (1734.1 – 2247.9) |
| Higher middle income | 2 dose threshold | 0.8 (0.6 – 1.9)               | 0.8 (0.3 – 2.0)          | 6.4 (5.5 – 7.8)                 | 6.3 (5.4 – 7.3)          |
|                      | 40+ threshold    | 9.7 (7.4 – 13.9)              | 11.4 (9.1 – 17.8)        | 71.9 (62.1 – 86.1)              | 72.3 (62.1 – 85.8)       |
|                      | 65+ threshold    | 62.4 (47.9 – 79.8)            | 175.4 (155.6 – 202.1)    | 358.4 (312.9 – 420.1)           | 461.3 (390.8 – 554.8)    |
|                      | Full sharing     | 148.4 (96.4 – 205.3)          | 388.7 (347.9 – 425.6)    | 574.4 (494.6 – 676.3)           | 1020.0 (845.0 – 1190.6)  |
| High income          | 2 dose threshold | 1.3 (-0.1 – 2.4)              | 4.6 (3.5 – 5.7)          | 0.3 (-0.4 – 1.2)                | 2.0 (1.3 – 2.6)          |
|                      | 40+ threshold    | -121.0 (-132.3 – -112.9)      | 59.7 (53.0 – 66.9)       | -113.8 (-124.1 – -95.5)         | 41.9 (33.8 – 47.6)       |
|                      | 65+ threshold    | -182.6 (-196.9 – -173.4)      | 53.4 (37.8 – 69.1)       | -198.1 (-220.0 – -179.0)        | 76.1 (60.0 – 92.3)       |
|                      | Full sharing     | -184.0 (-195.0 – -162.3)      | 188.2 (140.8 – 207.8)    | -484.9 (-527.4 – -444.8)        | 495.9 (300.1 – 595.4)    |

**Table S1:** Estimates for reductions in infection and mortality levels taken at the end of 2021 for central vaccine sharing strategies relative to the current scenario. Bracketed values represent a 95% prediction interval.

| Region               | Strategy         | Proportion vaccinated (2 doses) | Proportion infected   |                       | Mortalities per 100,000 |                       |
|----------------------|------------------|---------------------------------|-----------------------|-----------------------|-------------------------|-----------------------|
|                      |                  |                                 | unchanged behaviour   | adapted behaviour     | unchanged behaviour     | adapted behaviour     |
| World                | Default          | 44.4%                           | 48.4% (47.4% - 49.6%) | 48.4% (47.4% - 49.6%) | 133.1 (128.2 - 138.3)   | 133.1 (128.2 - 138.3) |
|                      | 2 dose threshold | 49.6%                           | 48.3% (47.3% - 49.6%) | 48.3% (47.3% - 49.5%) | 132.7 (127.8 - 137.9)   | 132.7 (127.8 - 137.9) |
|                      | 40+ threshold    | 49.6%                           | 49.3% (48.2% - 50.6%) | 46.8% (45.8% - 47.9%) | 131.6 (126.8 - 136.5)   | 129.5 (124.7 - 134.4) |
|                      | 65+ threshold    | 49.4%                           | 47.5% (46.1% - 49.1%) | 41.8% (40.3% - 43.3%) | 121.6 (117.7 - 126.5)   | 115.8 (111.9 - 121.0) |
|                      | Full sharing     | 49.4%                           | 44.4% (42.0% - 46.7%) | 29.1% (27.6% - 31.0%) | 115.4 (112.5 - 119.3)   | 84.0 (80.3 - 88.9)    |
| Low income           | Default          | 1.7%                            | 64.6% (61.6% - 66.9%) | 64.6% (61.6% - 66.9%) | 64.0 (59.4 - 70.1)      | 64.0 (59.4 - 70.1)    |
|                      | 2 dose threshold | 11.7%                           | 64.3% (61.3% - 66.6%) | 64.3% (61.3% - 66.6%) | 63.4 (58.8 - 69.3)      | 63.4 (58.8 - 69.4)    |
|                      | 40+ threshold    | 26.9%                           | 62.5% (59.4% - 64.8%) | 62.3% (59.3% - 64.6%) | 58.3 (53.9 - 63.9)      | 58.3 (54.0 - 64.2)    |
|                      | 65+ threshold    | 38.7%                           | 54.7% (51.5% - 57.2%) | 48.8% (46.1% - 51.2%) | 46.5 (43.4 - 49.8)      | 44.4 (41.6 - 47.5)    |
|                      | Full sharing     | 40.7%                           | 47.8% (45.2% - 50.7%) | 38.2% (33.9% - 43.0%) | 39.1 (36.5 - 41.5)      | 31.5 (28.9 - 34.2)    |
| Lower middle income  | Default          | 18.4%                           | 65.4% (63.2% - 68.1%) | 65.4% (63.2% - 68.1%) | 155.8 (144.2 - 169.7)   | 155.8 (144.2 - 169.7) |
|                      | 2 dose threshold | 28.5%                           | 65.2% (63.1% - 67.9%) | 65.2% (63.1% - 67.9%) | 155.2 (143.6 - 169.1)   | 155.2 (143.6 - 169.1) |
|                      | 40+ threshold    | 39.4%                           | 64.2% (61.9% - 66.9%) | 64.1% (61.8% - 66.7%) | 151.5 (139.9 - 165.5)   | 151.5 (139.8 - 165.6) |
|                      | 65+ threshold    | 46.2%                           | 60.8% (58.2% - 63.6%) | 59.3% (56.8% - 62.3%) | 134.6 (124.1 - 148.0)   | 133.1 (122.8 - 145.8) |
|                      | Full sharing     | 47.4%                           | 57.1% (54.0% - 60.4%) | 39.8% (37.5% - 42.7%) | 117.1 (107.9 - 128.9)   | 84.8 (75.5 - 95.3)    |
| Higher middle income | Default          | 66.0%                           | 33.8% (32.5% - 34.7%) | 33.8% (32.5% - 34.7%) | 105.9 (100.3 - 113.0)   | 105.9 (100.3 - 113.0) |
|                      | 2 dose threshold | 66.1%                           | 33.8% (32.5% - 34.7%) | 33.8% (32.5% - 34.7%) | 105.7 (100.1 - 112.8)   | 105.7 (100.1 - 112.8) |
|                      | 40+ threshold    | 56.6%                           | 33.5% (32.1% - 34.5%) | 33.4% (32.1% - 34.4%) | 103.4 (98.1 - 110.0)    | 103.4 (98.1 - 109.8)  |
|                      | 65+ threshold    | 51.6%                           | 31.7% (29.9% - 32.9%) | 27.7% (26.3% - 29.0%) | 93.4 (89.0 - 98.5)      | 89.7 (85.3 - 94.0)    |
|                      | Full sharing     | 51.4%                           | 28.6% (25.6% - 31.0%) | 20.4% (18.3% - 22.3%) | 86.0 (81.8 - 90.0)      | 70.7 (65.7 - 75.9)    |
| High income          | Default          | 75.3%                           | 35.7% (34.5% - 36.7%) | 35.7% (34.5% - 36.7%) | 162.9 (155.7 - 168.9)   | 162.9 (155.7 - 168.9) |
|                      | 2 dose threshold | 78.8%                           | 35.6% (34.4% - 36.6%) | 35.3% (34.1% - 36.3%) | 162.9 (155.7 - 168.9)   | 162.7 (155.6 - 168.7) |
|                      | 40+ threshold    | 68.5%                           | 45.7% (44.5% - 47.0%) | 30.7% (30.0% - 31.4%) | 171.3 (164.1 - 177.6)   | 159.8 (152.3 - 165.6) |
|                      | 65+ threshold    | 57.3%                           | 50.9% (49.8% - 52.0%) | 31.2% (29.9% - 32.6%) | 177.8 (170.2 - 184.8)   | 157.2 (150.3 - 163.1) |
|                      | Full sharing     | 53.6%                           | 50.8% (48.5% - 52.4%) | 20.3% (18.4% - 24.3%) | 199.1 (190.4 - 208.0)   | 127.0 (119.8 - 141.7) |

**Table S2:** Estimates for vaccination coverage, proportion infected and mortality rates (per 100,000) under each vaccine sharing strategy and income group taken at the start of 2022. Bracketed values represent a 95% prediction interval, proportion vaccinated is deterministic and so an interval is not provided.

**Table S3:** Individual country level estimates for vaccination coverage, proportion infected and mortality rates (per 100,000) under each vaccine sharing strategy taken at the start of 2022. Bracketed values represent a 95% prediction interval, proportion vaccinated is deterministic and so an interval is not provided.

Countries excluded due to data constraints:

Vatican City, Federated States of Micronesia, Marshall Islands, Northern Mariana Islands, United States Virgin Islands, Guam, American Samoa, South Georgia and the South Sandwich Islands, British Indian Ocean Territory, Saint Helena, Pitcairn Islands, Anguilla, Falkland Islands, Cayman Islands, Bermuda, British Virgin Islands, Turks and Caicos Islands, Montserrat, Jersey, Guernsey, Isle of Man, Taiwan, Eswatini, Somalia, Somaliland, Seychelles, San Marino, Saint Kitts and Nevis, Palau, Niue, Cook Islands, Aruba, Curacao, Nauru, Western Sahara, Monaco, Liechtenstein, Lebanon, Kosovo, Kiribati, Haiti, Grenada, Saint Pierre and Miquelon, Wallis and Futuna, Saint Martin, Saint-Bartholemy, French Polynesia, New Caledonia, French Southern and Antarctic Lands, Å...land Islands, Dominica, Greenland, Faroe Islands, Turkish Republic of Northern Cyprus, Ivory Coast, Republic of the Congo, Macau, Australian Indian Ocean Territories, Heard Island and McDonald Islands, Norfolk Island, Ashmore and Cartier Islands, Antigua and Barbuda, Andorra, Siachen Glacier, Antarctica, Sint Maarten.

| Country     | Income bracket | Strategy         | Proportion vaccinated | Proportion infected   |                       | Mortalities per 100,000 |               |
|-------------|----------------|------------------|-----------------------|-----------------------|-----------------------|-------------------------|---------------|
|             |                |                  |                       | unchanged             | adapted               | unchanged               | adapted       |
| Afghanistan | Low            | Default          | 3.7%                  | 93.8% (91.3% - 96.7%) | 93.8% (91.3% - 96.7%) | 141 (106,207)           | 141 (106,207) |
| Afghanistan | Low            | 2 dose threshold | 16.9%                 | 93.8% (91.2% - 96.6%) | 93.8% (91.2% - 96.6%) | 141 (105,206)           | 141 (105,206) |
| Afghanistan | Low            | 40+ threshold    | 36.2%                 | 92.8% (90.6% - 96.4%) | 92.7% (90.1% - 96.4%) | 133 (103,195)           | 133 (103,195) |
| Afghanistan | Low            | 65+ threshold    | 52.0%                 | 85.9% (80.3% - 93.2%) | 73.7% (63.4% - 80.4%) | 119 (98,153)            | 114 (92,140)  |
| Afghanistan | Low            | Full sharing     | 54.5%                 | 79.5% (72.8% - 90.3%) | 72.4% (58.7% - 80.4%) | 115 (95,144)            | 113 (92,136)  |
| Albania     | Upper middle   | Default          | 29.3%                 | 72.2% (64.0% - 82.0%) | 72.2% (64.0% - 82.0%) | 314 (233,423)           | 314 (233,423) |
| Albania     | Upper middle   | 2 dose threshold | 39.0%                 | 72.1% (63.9% - 81.7%) | 72.0% (63.9% - 81.7%) | 314 (232,423)           | 314 (232,423) |
| Albania     | Upper middle   | 40+ threshold    | 52.8%                 | 71.4% (63.6% - 80.3%) | 70.7% (62.8% - 79.0%) | 313 (232,421)           | 313 (232,421) |
| Albania     | Upper middle   | 65+ threshold    | 55.1%                 | 70.2% (62.3% - 78.0%) | 69.1% (61.5% - 74.6%) | 308 (228,417)           | 308 (227,417) |
| Albania     | Upper middle   | Full sharing     | 52.8%                 | 69.1% (61.2% - 76.1%) | 60.1% (54.2% - 66.0%) | 286 (214,384)           | 246 (186,326) |
| Algeria     | Lower middle   | Default          | 10.1%                 | 27.3% (23.9% - 31.9%) | 27.3% (23.9% - 31.9%) | 90 (78,103)             | 90 (78,103)   |
| Algeria     | Lower middle   | 2 dose threshold | 22.8%                 | 27.2% (23.8% - 31.8%) | 27.2% (23.8% - 31.8%) | 89 (78,102)             | 89 (78,102)   |
| Algeria     | Lower middle   | 40+ threshold    | 40.8%                 | 26.4% (23.0% - 30.9%) | 26.4% (23.1% - 31.1%) | 84 (73,96)              | 84 (74,96)    |
| Algeria     | Lower middle   | 65+ threshold    | 52.4%                 | 20.9% (17.9% - 24.9%) | 20.6% (16.4% - 25.5%) | 65 (57,75)              | 64 (56,74)    |
| Algeria     | Lower middle   | Full sharing     | 53.7%                 | 16.7% (14.2% - 20.2%) | 17.5% (11.7% - 28.1%) | 56 (50,64)              | 57 (43,84)    |
| Angola      | Lower middle   | Default          | 6.3%                  | 55.5% (46.6% - 64.9%) | 55.5% (46.6% - 64.9%) | 83 (66,101)             | 83 (66,101)   |
| Angola      | Lower middle   | 2 dose threshold | 19.2%                 | 55.0% (46.1% - 64.3%) | 55.0% (46.2% - 64.2%) | 82 (65,100)             | 82 (65,100)   |
| Angola      | Lower middle   | 40+ threshold    | 38.1%                 | 53.0% (44.7% - 61.8%) | 52.8% (44.5% - 61.4%) | 78 (62,95)              | 78 (62,95)    |
| Angola      | Lower middle   | 65+ threshold    | 52.1%                 | 45.5% (37.4% - 54.9%) | 45.4% (36.1% - 55.1%) | 57 (47,68)              | 55 (45,65)    |
| Angola      | Lower middle   | Full sharing     | 54.7%                 | 35.8% (27.7% - 47.6%) | 25.9% (17.4% - 44.9%) | 43 (36,51)              | 33 (26,46)    |
| Argentina   | Upper middle   | Default          | 61.2%                 | 69.5% (66.1% - 72.4%) | 69.5% (66.1% - 72.4%) | 245 (214,289)           | 245 (214,289) |
| Argentina   | Upper middle   | 2 dose threshold | 67.6%                 | 69.5% (66.1% - 72.4%) | 69.5% (66.1% - 72.4%) | 244 (214,288)           | 244 (214,288) |
| Argentina   | Upper middle   | 40+ threshold    | 57.9%                 | 69.1% (65.8% - 72.0%) | 69.1% (65.8% - 72.0%) | 242 (212,285)           | 242 (212,286) |
| Argentina   | Upper middle   | 65+ threshold    | 55.2%                 | 66.9% (63.2% - 70.4%) | 64.7% (59.8% - 68.7%) | 232 (204,272)           | 228 (202,266) |

| Country    | Income bracket | Strategy         | Proportion vaccinated | Proportion infected   |                       | Mortalities per 100,000 |               |
|------------|----------------|------------------|-----------------------|-----------------------|-----------------------|-------------------------|---------------|
|            |                |                  |                       | unchanged             | adapted               | unchanged               | adapted       |
| Argentina  | Upper middle   | Full sharing     | 53.3%                 | 62.0% (56.8% - 67.2%) | 48.2% (36.7% - 59.7%) | 226 (197,263)           | 191 (158,244) |
| Armenia    | Upper middle   | Default          | 3.4%                  | 79.8% (73.1% - 85.6%) | 79.8% (73.1% - 85.6%) | 398 (306,480)           | 398 (306,480) |
| Armenia    | Upper middle   | 2 dose threshold | 16.1%                 | 79.7% (73.0% - 85.6%) | 79.7% (73.0% - 85.6%) | 397 (304,478)           | 397 (304,478) |
| Armenia    | Upper middle   | 40+ threshold    | 35.8%                 | 79.3% (72.5% - 85.0%) | 79.3% (72.6% - 84.9%) | 385 (287,470)           | 385 (287,469) |
| Armenia    | Upper middle   | 65+ threshold    | 50.4%                 | 75.9% (69.9% - 81.3%) | 74.2% (68.3% - 80.3%) | 322 (239,406)           | 318 (237,398) |
| Armenia    | Upper middle   | Full sharing     | 53.2%                 | 73.6% (66.7% - 82.0%) | 58.7% (53.9% - 65.4%) | 293 (234,355)           | 269 (223,317) |
| Australia  | High           | Default          | 37.4%                 | 13.4% (11.0% - 16.1%) | 13.4% (11.0% - 16.1%) | 13 (12,13)              | 13 (12,13)    |
| Australia  | High           | 2 dose threshold | 46.6%                 | 9.7% (7.9% - 11.4%)   | 9.6% (7.9% - 11.5%)   | 13 (12,13)              | 13 (12,13)    |
| Australia  | High           | 40+ threshold    | 58.1%                 | 4.8% (3.9% - 5.7%)    | 2.4% (2.1% - 2.6%)    | 11 (11,12)              | 11 (11,12)    |
| Australia  | High           | 65+ threshold    | 54.8%                 | 2.4% (1.9% - 2.9%)    | 0.6% (0.5% - 0.7%)    | 8 (8,9)                 | 7 (7,7)       |
| Australia  | High           | Full sharing     | 53.2%                 | 1.1% (0.7% - 1.4%)    | 0.4% (0.4% - 0.7%)    | 7 (6,7)                 | 4 (4,5)       |
| Austria    | High           | Default          | 77.0%                 | 30.1% (26.2% - 34.4%) | 30.1% (26.2% - 34.4%) | 188 (159,218)           | 188 (159,218) |
| Austria    | High           | 2 dose threshold | 80.7%                 | 29.9% (25.7% - 34.2%) | 29.9% (25.8% - 34.2%) | 187 (159,218)           | 187 (159,218) |
| Austria    | High           | 40+ threshold    | 70.7%                 | 31.9% (27.8% - 36.3%) | 27.9% (23.8% - 31.6%) | 187 (159,218)           | 187 (158,217) |
| Austria    | High           | 65+ threshold    | 58.3%                 | 53.6% (48.9% - 58.1%) | 28.3% (22.8% - 35.6%) | 197 (167,231)           | 186 (158,216) |
| Austria    | High           | Full sharing     | 52.7%                 | 52.7% (44.4% - 58.7%) | 17.3% (14.6% - 22.4%) | 217 (186,256)           | 138 (115,167) |
| Azerbaijan | Upper middle   | Default          | 36.5%                 | 77.9% (68.4% - 84.7%) | 77.9% (68.4% - 84.7%) | 269 (198,350)           | 269 (198,350) |
| Azerbaijan | Upper middle   | 2 dose threshold | 45.5%                 | 77.8% (68.3% - 84.6%) | 77.8% (68.3% - 84.5%) | 269 (198,350)           | 269 (198,350) |
| Azerbaijan | Upper middle   | 40+ threshold    | 53.3%                 | 77.0% (67.4% - 83.9%) | 76.4% (67.2% - 82.7%) | 266 (196,345)           | 265 (196,345) |
| Azerbaijan | Upper middle   | 65+ threshold    | 52.7%                 | 76.0% (66.2% - 83.2%) | 62.2% (53.1% - 69.4%) | 261 (195,335)           | 247 (188,316) |
| Azerbaijan | Upper middle   | Full sharing     | 53.2%                 | 73.7% (59.4% - 82.7%) | 53.0% (45.6% - 62.5%) | 256 (195,321)           | 216 (153,295) |
| Bahrain    | High           | Default          | 100.0%                | 52.7% (46.7% - 58.1%) | 52.7% (46.7% - 58.1%) | 92 (72,117)             | 92 (72,117)   |
| Bahrain    | High           | 2 dose threshold | 93.2%                 | 52.6% (46.7% - 58.1%) | 52.6% (46.7% - 58.1%) | 92 (72,117)             | 92 (72,117)   |
| Bahrain    | High           | 40+ threshold    | 56.0%                 | 62.6% (58.6% - 66.3%) | 57.9% (47.9% - 64.0%) | 106 (82,139)            | 99 (78,128)   |
| Bahrain    | High           | 65+ threshold    | 61.7%                 | 61.4% (57.0% - 65.3%) | 55.7% (49.1% - 60.5%) | 114 (88,151)            | 102 (79,132)  |
| Bahrain    | High           | Full sharing     | 63.3%                 | 54.4% (48.9% - 59.4%) | 30.5% (23.6% - 40.7%) | 101 (79,132)            | 72 (55,94)    |
| Bangladesh | Lower middle   | Default          | 5.9%                  | 79.1% (70.7% - 91.3%) | 79.1% (70.7% - 91.3%) | 71 (48,112)             | 71 (48,112)   |
| Bangladesh | Lower middle   | 2 dose threshold | 18.5%                 | 79.0% (70.7% - 91.3%) | 79.0% (70.7% - 91.3%) | 70 (48,112)             | 70 (48,112)   |
| Bangladesh | Lower middle   | 40+ threshold    | 37.7%                 | 78.6% (70.0% - 91.0%) | 78.6% (69.9% - 91.0%) | 69 (47,108)             | 69 (47,108)   |
| Bangladesh | Lower middle   | 65+ threshold    | 52.8%                 | 75.5% (64.2% - 87.6%) | 71.0% (54.8% - 80.2%) | 62 (43,94)              | 61 (39,88)    |
| Bangladesh | Lower middle   | Full sharing     | 53.6%                 | 72.0% (54.9% - 84.2%) | 48.8% (34.8% - 58.5%) | 59 (42,83)              | 48 (38,66)    |
| Barbados   | High           | Default          | 48.4%                 | 25.9% (1.1% - 45.3%)  | 25.9% (1.1% - 45.3%)  | 45 (8,72)               | 45 (8,72)     |
| Barbados   | High           | 2 dose threshold | 55.5%                 | 25.8% (1.1% - 45.3%)  | 25.8% (1.1% - 45.1%)  | 45 (8,72)               | 45 (8,72)     |
| Barbados   | High           | 40+ threshold    | 63.7%                 | 21.6% (1.1% - 37.7%)  | 21.3% (1.1% - 37.2%)  | 41 (8,66)               | 41 (8,66)     |
| Barbados   | High           | 65+ threshold    | 57.3%                 | 49.1% (1.1% - 81.5%)  | 5.7% (1.1% - 9.3%)    | 69 (8,118)              | 32 (8,49)     |

| Country                | Income bracket | Strategy         | Proportion vaccinated | Proportion infected   |                       | Mortalities per 100,000 |                |
|------------------------|----------------|------------------|-----------------------|-----------------------|-----------------------|-------------------------|----------------|
|                        |                |                  |                       | unchanged             | adapted               | unchanged               | adapted        |
| Barbados               | High           | Full sharing     | 52.9%                 | 48.2% (1.1% - 86.4%)  | 1.6% (1.1% - 2.1%)    | 71 (8,129)              | 9 (8,9)        |
| Belarus                | Upper middle   | Default          | 15.6%                 | 61.3% (52.2% - 68.6%) | 61.3% (52.2% - 68.6%) | 514 (380,671)           | 514 (380,671)  |
| Belarus                | Upper middle   | 2 dose threshold | 27.0%                 | 61.2% (52.1% - 68.5%) | 61.2% (52.1% - 68.5%) | 513 (379,670)           | 513 (379,670)  |
| Belarus                | Upper middle   | 40+ threshold    | 45.0%                 | 60.7% (51.4% - 68.1%) | 60.4% (51.1% - 67.6%) | 494 (366,646)           | 494 (365,646)  |
| Belarus                | Upper middle   | 65+ threshold    | 51.5%                 | 56.2% (46.3% - 64.2%) | 55.9% (45.4% - 64.5%) | 418 (315,533)           | 412 (308,535)  |
| Belarus                | Upper middle   | Full sharing     | 52.8%                 | 52.1% (37.9% - 63.4%) | 31.3% (20.4% - 47.0%) | 362 (277,462)           | 249 (195,328)  |
| Belgium                | High           | Default          | 93.3%                 | 42.0% (37.8% - 46.1%) | 42.0% (37.8% - 46.1%) | 405 (348,461)           | 405 (348,461)  |
| Belgium                | High           | 2 dose threshold | 91.8%                 | 41.9% (37.7% - 46.0%) | 41.8% (37.5% - 45.8%) | 405 (348,461)           | 405 (348,461)  |
| Belgium                | High           | 40+ threshold    | 70.4%                 | 46.3% (41.0% - 50.9%) | 40.6% (36.5% - 44.6%) | 404 (348,461)           | 404 (348,460)  |
| Belgium                | High           | 65+ threshold    | 58.1%                 | 62.9% (58.5% - 67.0%) | 46.4% (35.2% - 53.7%) | 409 (351,468)           | 406 (348,466)  |
| Belgium                | High           | Full sharing     | 52.8%                 | 64.1% (56.4% - 69.6%) | 30.6% (23.6% - 43.7%) | 465 (397,537)           | 376 (300,519)  |
| Benin                  | Lower middle   | Default          | 0.6%                  | 42.9% (35.8% - 50.1%) | 42.9% (35.8% - 50.1%) | 70 (53,91)              | 70 (53,91)     |
| Benin                  | Lower middle   | 2 dose threshold | 14.1%                 | 42.8% (35.7% - 49.9%) | 42.8% (35.6% - 49.9%) | 69 (53,90)              | 69 (53,90)     |
| Benin                  | Lower middle   | 40+ threshold    | 34.5%                 | 40.7% (33.8% - 47.4%) | 40.6% (33.8% - 46.7%) | 55 (41,71)              | 55 (41,71)     |
| Benin                  | Lower middle   | 65+ threshold    | 51.7%                 | 22.9% (17.7% - 29.9%) | 20.7% (14.7% - 28.1%) | 33 (28,39)              | 32 (28,37)     |
| Benin                  | Lower middle   | Full sharing     | 54.4%                 | 20.6% (14.8% - 27.9%) | 8.3% (5.7% - 11.7%)   | 28 (24,33)              | 12 (10,15)     |
| Bolivia                | Lower middle   | Default          | 29.4%                 | 88.2% (77.8% - 93.8%) | 88.2% (77.8% - 93.8%) | 771 (482,1141)          | 771 (482,1141) |
| Bolivia                | Lower middle   | 2 dose threshold | 39.5%                 | 88.2% (77.8% - 93.8%) | 88.2% (77.8% - 93.8%) | 769 (481,1138)          | 769 (481,1138) |
| Bolivia                | Lower middle   | 40+ threshold    | 49.2%                 | 87.9% (77.6% - 93.6%) | 87.9% (77.6% - 93.6%) | 755 (475,1123)          | 755 (475,1123) |
| Bolivia                | Lower middle   | 65+ threshold    | 52.5%                 | 85.7% (75.2% - 92.0%) | 81.0% (74.1% - 88.1%) | 664 (451,987)           | 650 (430,979)  |
| Bolivia                | Lower middle   | Full sharing     | 53.7%                 | 82.1% (70.8% - 89.8%) | 69.6% (63.9% - 78.9%) | 605 (445,854)           | 546 (422,752)  |
| Bosnia and Herzegovina | Upper middle   | Default          | 13.2%                 | 77.7% (72.4% - 82.0%) | 77.7% (72.4% - 82.0%) | 290 (228,374)           | 290 (228,374)  |
| Bosnia and Herzegovina | Upper middle   | 2 dose threshold | 24.7%                 | 77.5% (72.2% - 81.9%) | 77.4% (72.1% - 81.8%) | 289 (228,374)           | 289 (228,374)  |
| Bosnia and Herzegovina | Upper middle   | 40+ threshold    | 42.7%                 | 77.2% (71.7% - 81.8%) | 75.0% (69.8% - 79.7%) | 285 (226,365)           | 284 (226,364)  |
| Bosnia and Herzegovina | Upper middle   | 65+ threshold    | 51.6%                 | 72.1% (65.3% - 78.6%) | 66.1% (59.0% - 74.4%) | 273 (218,344)           | 271 (218,339)  |
| Bosnia and Herzegovina | Upper middle   | Full sharing     | 52.7%                 | 68.2% (59.9% - 76.3%) | 55.5% (47.0% - 61.1%) | 250 (201,312)           | 219 (168,284)  |
| Brazil                 | Upper middle   | Default          | 55.6%                 | 64.3% (60.2% - 68.2%) | 64.3% (60.2% - 68.2%) | 212 (194,230)           | 212 (194,230)  |
| Brazil                 | Upper middle   | 2 dose threshold | 62.5%                 | 64.3% (60.1% - 68.2%) | 64.3% (60.1% - 68.2%) | 212 (194,230)           | 212 (194,230)  |
| Brazil                 | Upper middle   | 40+ threshold    | 57.2%                 | 63.9% (59.5% - 67.8%) | 63.9% (59.5% - 67.7%) | 211 (193,228)           | 211 (193,228)  |
| Brazil                 | Upper middle   | 65+ threshold    | 53.9%                 | 62.7% (58.1% - 66.7%) | 60.0% (55.9% - 63.7%) | 208 (190,224)           | 203 (186,221)  |
| Brazil                 | Upper middle   | Full sharing     | 53.2%                 | 57.7% (51.6% - 63.4%) | 46.0% (34.3% - 55.5%) | 205 (188,220)           | 168 (142,207)  |
| Bulgaria               | Upper middle   | Default          | 19.9%                 | 79.5% (70.3% - 87.4%) | 79.5% (70.3% - 87.4%) | 447 (337,595)           | 447 (337,595)  |
| Bulgaria               | Upper middle   | 2 dose threshold | 30.6%                 | 79.5% (70.3% - 87.4%) | 79.4% (70.3% - 87.4%) | 447 (336,594)           | 447 (336,594)  |
| Bulgaria               | Upper middle   | 40+ threshold    | 47.2%                 | 79.2% (69.7% - 87.4%) | 78.2% (68.9% - 86.4%) | 439 (332,580)           | 438 (332,579)  |
| Bulgaria               | Upper middle   | 65+ threshold    | 55.4%                 | 75.7% (64.5% - 84.3%) | 59.4% (50.7% - 67.2%) | 421 (323,549)           | 408 (314,533)  |



| Country                  | Income bracket | Strategy         | Proportion vaccinated | Proportion infected   |                       | Mortalities per 100,000 |               |
|--------------------------|----------------|------------------|-----------------------|-----------------------|-----------------------|-------------------------|---------------|
|                          |                |                  |                       | unchanged             | adapted               | unchanged               | adapted       |
| Bulgaria                 | Upper middle   | Full sharing     | 52.7%                 | 72.8% (58.7% - 83.4%) | 50.1% (33.7% - 59.5%) | 405 (311,526)           | 350 (282,420) |
| Burkina Faso             | Low            | Default          | 0.3%                  | 76.7% (73.0% - 79.1%) | 76.7% (73.0% - 79.1%) | 35 (24,50)              | 35 (24,50)    |
| Burkina Faso             | Low            | 2 dose threshold | 13.8%                 | 74.9% (70.4% - 79.1%) | 74.9% (70.3% - 79.1%) | 34 (23,48)              | 34 (23,47)    |
| Burkina Faso             | Low            | 40+ threshold    | 34.4%                 | 68.5% (60.1% - 78.9%) | 67.3% (58.3% - 78.8%) | 31 (23,42)              | 31 (23,42)    |
| Burkina Faso             | Low            | 65+ threshold    | 51.8%                 | 62.9% (52.4% - 75.7%) | 62.6% (52.3% - 75.8%) | 29 (19,39)              | 29 (19,39)    |
| Burkina Faso             | Low            | Full sharing     | 54.6%                 | 60.9% (51.4% - 70.3%) | 56.9% (41.4% - 65.3%) | 25 (17,35)              | 23 (16,29)    |
| Cabo Verde               | Lower middle   | Default          | 0.0%                  | 67.2% (59.1% - 75.3%) | 67.2% (59.1% - 75.3%) | 106 (80,133)            | 106 (80,133)  |
| Cabo Verde               | Lower middle   | 2 dose threshold | 13.8%                 | 67.1% (59.1% - 75.3%) | 67.1% (59.1% - 75.3%) | 105 (79,132)            | 105 (79,132)  |
| Cabo Verde               | Lower middle   | 40+ threshold    | 34.1%                 | 66.6% (58.5% - 75.0%) | 66.6% (58.6% - 75.0%) | 100 (76,123)            | 100 (76,124)  |
| Cabo Verde               | Lower middle   | 65+ threshold    | 51.1%                 | 63.0% (53.9% - 72.9%) | 62.3% (52.7% - 72.2%) | 80 (63,98)              | 80 (62,96)    |
| Cabo Verde               | Lower middle   | Full sharing     | 53.7%                 | 58.0% (48.4% - 69.2%) | 49.2% (37.7% - 55.9%) | 64 (51,78)              | 55 (42,67)    |
| Cameroon                 | Lower middle   | Default          | 0.8%                  | 62.0% (53.0% - 68.7%) | 62.0% (53.0% - 68.7%) | 58 (41,81)              | 58 (41,81)    |
| Cameroon                 | Lower middle   | 2 dose threshold | 14.8%                 | 61.7% (52.6% - 68.4%) | 61.7% (52.6% - 68.4%) | 57 (41,80)              | 57 (41,80)    |
| Cameroon                 | Lower middle   | 40+ threshold    | 35.0%                 | 58.9% (50.4% - 65.9%) | 58.6% (50.2% - 65.8%) | 52 (38,72)              | 52 (38,72)    |
| Cameroon                 | Lower middle   | 65+ threshold    | 51.9%                 | 52.6% (43.9% - 60.5%) | 52.5% (44.6% - 59.9%) | 45 (33,62)              | 45 (33,62)    |
| Cameroon                 | Lower middle   | Full sharing     | 54.5%                 | 50.0% (41.0% - 57.4%) | 47.9% (31.2% - 55.8%) | 38 (28,51)              | 35 (27,43)    |
| Canada                   | High           | Default          | 99.9%                 | 18.4% (17.0% - 20.2%) | 18.4% (17.0% - 20.2%) | 164 (148,182)           | 164 (148,182) |
| Canada                   | High           | 2 dose threshold | 93.1%                 | 18.4% (17.0% - 20.2%) | 18.4% (17.0% - 20.2%) | 164 (148,182)           | 164 (148,182) |
| Canada                   | High           | 40+ threshold    | 69.2%                 | 18.4% (17.0% - 20.2%) | 18.3% (16.9% - 20.0%) | 163 (147,181)           | 163 (147,181) |
| Canada                   | High           | 65+ threshold    | 57.1%                 | 26.6% (21.3% - 34.4%) | 23.4% (17.1% - 30.5%) | 174 (157,192)           | 168 (143,185) |
| Canada                   | High           | Full sharing     | 53.4%                 | 26.4% (19.6% - 36.5%) | 8.4% (6.0% - 12.6%)   | 183 (163,207)           | 97 (80,120)   |
| Central African Republic | Low            | Default          | 2.5%                  | 74.3% (60.9% - 84.5%) | 74.3% (60.9% - 84.5%) | 179 (126,236)           | 179 (126,236) |
| Central African Republic | Low            | 2 dose threshold | 15.9%                 | 74.3% (60.8% - 84.5%) | 74.3% (60.8% - 84.5%) | 178 (125,234)           | 178 (125,234) |
| Central African Republic | Low            | 40+ threshold    | 35.9%                 | 74.3% (60.7% - 84.4%) | 74.3% (60.7% - 84.4%) | 175 (123,231)           | 175 (123,231) |
| Central African Republic | Low            | 65+ threshold    | 51.8%                 | 73.6% (59.5% - 83.8%) | 73.4% (59.0% - 83.7%) | 155 (109,204)           | 155 (108,204) |
| Central African Republic | Low            | Full sharing     | 54.7%                 | 71.1% (56.3% - 81.5%) | 50.2% (45.1% - 54.2%) | 119 (84,155)            | 88 (60,125)   |
| Chad                     | Low            | Default          | 0.1%                  | 39.4% (31.6% - 46.0%) | 39.4% (31.6% - 46.0%) | 57 (46,70)              | 57 (46,70)    |
| Chad                     | Low            | 2 dose threshold | 14.5%                 | 39.3% (31.5% - 46.0%) | 39.3% (31.5% - 46.0%) | 57 (46,69)              | 57 (46,69)    |
| Chad                     | Low            | 40+ threshold    | 35.5%                 | 39.1% (31.1% - 45.8%) | 39.1% (31.1% - 45.8%) | 56 (46,68)              | 56 (46,68)    |
| Chad                     | Low            | 65+ threshold    | 52.2%                 | 38.9% (30.7% - 45.6%) | 38.9% (30.7% - 45.6%) | 54 (44,65)              | 54 (44,65)    |
| Chad                     | Low            | Full sharing     | 55.0%                 | 38.2% (30.1% - 44.9%) | 27.8% (18.7% - 42.6%) | 47 (38,56)              | 34 (29,44)    |
| Chile                    | High           | Default          | 100.0%                | 42.5% (39.8% - 44.9%) | 42.5% (39.8% - 44.9%) | 176 (168,182)           | 176 (168,182) |
| Chile                    | High           | 2 dose threshold | 91.1%                 | 42.4% (39.8% - 44.8%) | 42.5% (39.8% - 44.8%) | 176 (168,182)           | 176 (168,182) |
| Chile                    | High           | 40+ threshold    | 64.4%                 | 52.6% (50.2% - 55.5%) | 43.7% (41.1% - 46.7%) | 184 (176,191)           | 176 (169,182) |
| Chile                    | High           | 65+ threshold    | 56.4%                 | 75.9% (73.9% - 77.6%) | 50.5% (46.1% - 55.4%) | 233 (219,248)           | 189 (185,194) |

| Country        | Income bracket | Strategy         | Proportion vaccinated | Proportion infected   |                       | Mortalities per 100,000 |               |
|----------------|----------------|------------------|-----------------------|-----------------------|-----------------------|-------------------------|---------------|
|                |                |                  |                       | unchanged             | adapted               | unchanged               | adapted       |
| Chile          | High           | Full sharing     | 53.2%                 | 72.8% (67.5% - 77.4%) | 30.3% (21.8% - 54.3%) | 260 (239,280)           | 146 (121,231) |
| China          | Upper middle   | Default          | 100.0%                | 0.3% (0.2% - 0.4%)    | 0.3% (0.2% - 0.4%)    | 1 (1,1)                 | 1 (1,1)       |
| China          | Upper middle   | 2 dose threshold | 92.2%                 | 0.3% (0.2% - 0.4%)    | 0.3% (0.2% - 0.4%)    | 1 (1,1)                 | 1 (1,1)       |
| China          | Upper middle   | 40+ threshold    | 66.6%                 | 0.3% (0.2% - 0.4%)    | 0.3% (0.2% - 0.4%)    | 1 (1,1)                 | 1 (1,1)       |
| China          | Upper middle   | 65+ threshold    | 53.9%                 | 0.3% (0.2% - 0.4%)    | 0.3% (0.2% - 0.4%)    | 1 (1,1)                 | 1 (1,1)       |
| China          | Upper middle   | Full sharing     | 53.2%                 | 0.3% (0.2% - 0.4%)    | 0.2% (0.1% - 0.3%)    | 1 (1,1)                 | 1 (1,1)       |
| Colombia       | Upper middle   | Default          | 36.3%                 | 62.8% (59.5% - 65.4%) | 62.8% (59.5% - 65.4%) | 291 (254,340)           | 291 (254,340) |
| Colombia       | Upper middle   | 2 dose threshold | 45.8%                 | 62.8% (59.5% - 65.3%) | 62.8% (59.5% - 65.5%) | 290 (253,340)           | 291 (253,340) |
| Colombia       | Upper middle   | 40+ threshold    | 52.9%                 | 62.3% (59.0% - 65.0%) | 62.4% (59.1% - 65.0%) | 285 (247,332)           | 285 (247,333) |
| Colombia       | Upper middle   | 65+ threshold    | 53.1%                 | 57.9% (54.2% - 61.3%) | 56.8% (52.8% - 60.3%) | 246 (214,285)           | 242 (213,279) |
| Colombia       | Upper middle   | Full sharing     | 53.3%                 | 50.0% (45.9% - 55.2%) | 34.8% (27.4% - 49.3%) | 205 (177,236)           | 155 (133,210) |
| Costa Rica     | Upper middle   | Default          | 50.8%                 | 58.7% (52.9% - 63.8%) | 58.7% (52.9% - 63.8%) | 95 (89,100)             | 95 (89,100)   |
| Costa Rica     | Upper middle   | 2 dose threshold | 58.2%                 | 58.7% (52.8% - 63.8%) | 58.7% (52.8% - 63.8%) | 95 (89,100)             | 95 (89,100)   |
| Costa Rica     | Upper middle   | 40+ threshold    | 57.3%                 | 58.2% (52.4% - 63.4%) | 58.2% (52.5% - 63.3%) | 93 (88,99)              | 93 (88,99)    |
| Costa Rica     | Upper middle   | 65+ threshold    | 53.9%                 | 55.6% (49.6% - 61.6%) | 57.0% (50.1% - 63.4%) | 86 (82,90)              | 85 (81,89)    |
| Costa Rica     | Upper middle   | Full sharing     | 53.2%                 | 53.9% (46.3% - 61.2%) | 32.6% (24.7% - 48.7%) | 83 (79,87)              | 63 (56,86)    |
| Croatia        | High           | Default          | 51.9%                 | 71.2% (66.1% - 75.5%) | 71.2% (66.1% - 75.5%) | 244 (202,297)           | 244 (202,297) |
| Croatia        | High           | 2 dose threshold | 58.9%                 | 70.1% (64.8% - 74.4%) | 70.0% (64.7% - 74.4%) | 244 (202,297)           | 244 (202,297) |
| Croatia        | High           | 40+ threshold    | 67.0%                 | 67.5% (62.0% - 72.1%) | 62.3% (57.1% - 67.1%) | 243 (201,295)           | 242 (201,294) |
| Croatia        | High           | 65+ threshold    | 57.6%                 | 74.2% (69.7% - 78.0%) | 60.3% (52.9% - 65.8%) | 239 (198,290)           | 236 (196,286) |
| Croatia        | High           | Full sharing     | 52.9%                 | 77.5% (70.9% - 81.9%) | 47.0% (38.0% - 57.4%) | 244 (200,298)           | 215 (179,265) |
| Cuba           | Upper middle   | Default          | 36.3%                 | 27.7% (23.7% - 31.8%) | 27.7% (23.7% - 31.8%) | 119 (100,149)           | 119 (100,149) |
| Cuba           | Upper middle   | 2 dose threshold | 45.7%                 | 27.6% (23.5% - 31.7%) | 27.6% (23.6% - 31.7%) | 118 (99,147)            | 118 (99,147)  |
| Cuba           | Upper middle   | 40+ threshold    | 59.5%                 | 26.5% (22.5% - 30.7%) | 26.5% (22.6% - 30.7%) | 103 (87,127)            | 103 (86,127)  |
| Cuba           | Upper middle   | 65+ threshold    | 50.2%                 | 18.6% (14.5% - 22.4%) | 14.9% (10.4% - 19.3%) | 45 (39,54)              | 39 (31,48)    |
| Cuba           | Upper middle   | Full sharing     | 52.9%                 | 8.6% (5.8% - 12.4%)   | 2.7% (0.7% - 5.9%)    | 20 (17,24)              | 5 (3,10)      |
| Cyprus         | High           | Default          | 56.8%                 | 21.3% (18.0% - 24.3%) | 21.3% (18.0% - 24.3%) | 37 (35,39)              | 37 (35,39)    |
| Cyprus         | High           | 2 dose threshold | 63.1%                 | 21.3% (18.0% - 24.2%) | 21.3% (18.0% - 24.3%) | 37 (35,39)              | 37 (35,39)    |
| Cyprus         | High           | 40+ threshold    | 64.4%                 | 20.8% (17.6% - 23.6%) | 20.8% (17.5% - 23.8%) | 36 (35,39)              | 36 (35,39)    |
| Cyprus         | High           | 65+ threshold    | 56.0%                 | 18.7% (16.0% - 21.5%) | 20.3% (12.6% - 27.1%) | 34 (32,36)              | 34 (30,39)    |
| Cyprus         | High           | Full sharing     | 52.9%                 | 15.9% (13.2% - 19.3%) | 8.2% (5.0% - 11.0%)   | 37 (35,39)              | 18 (14,21)    |
| Czech Republic | High           | Default          | 69.3%                 | 66.0% (57.4% - 73.7%) | 66.0% (57.4% - 73.7%) | 210 (178,247)           | 210 (178,247) |
| Czech Republic | High           | 2 dose threshold | 74.2%                 | 66.0% (57.4% - 73.7%) | 66.0% (57.4% - 73.7%) | 210 (178,247)           | 210 (178,247) |
| Czech Republic | High           | 40+ threshold    | 69.3%                 | 66.0% (57.4% - 73.7%) | 65.9% (57.2% - 73.7%) | 210 (178,247)           | 210 (178,247) |
| Czech Republic | High           | 65+ threshold    | 57.9%                 | 66.1% (57.7% - 73.7%) | 65.8% (57.1% - 73.6%) | 209 (177,246)           | 209 (177,246) |

| Country            | Income bracket | Strategy         | Proportion vaccinated | Proportion infected   |                       | Mortalities per 100,000 |               |
|--------------------|----------------|------------------|-----------------------|-----------------------|-----------------------|-------------------------|---------------|
|                    |                |                  |                       | unchanged             | adapted               | unchanged               | adapted       |
| Czech Republic     | High           | Full sharing     | 52.8%                 | 66.5% (57.9% - 74.2%) | 57.7% (40.3% - 64.4%) | 222 (186,263)           | 188 (158,215) |
| DR Congo           | Low            | Default          | 0.1%                  | 65.7% (54.1% - 74.6%) | 65.7% (54.1% - 74.6%) | 69 (52,92)              | 69 (52,92)    |
| DR Congo           | Low            | 2 dose threshold | 14.3%                 | 65.6% (54.0% - 74.5%) | 65.6% (54.0% - 74.5%) | 68 (51,91)              | 68 (51,91)    |
| DR Congo           | Low            | 40+ threshold    | 34.8%                 | 64.9% (53.0% - 74.0%) | 64.9% (53.0% - 73.9%) | 62 (47,83)              | 62 (47,83)    |
| DR Congo           | Low            | 65+ threshold    | 52.0%                 | 55.6% (42.8% - 66.8%) | 48.9% (38.2% - 59.4%) | 45 (35,58)              | 43 (34,56)    |
| DR Congo           | Low            | Full sharing     | 54.6%                 | 47.2% (36.1% - 57.4%) | 41.1% (24.2% - 56.7%) | 38 (29,49)              | 31 (23,40)    |
| Denmark            | High           | Default          | 84.7%                 | 25.3% (21.2% - 30.2%) | 25.3% (21.2% - 30.2%) | 99 (88,109)             | 99 (88,109)   |
| Denmark            | High           | 2 dose threshold | 87.9%                 | 24.5% (20.7% - 29.3%) | 24.4% (20.6% - 29.2%) | 99 (88,109)             | 99 (88,109)   |
| Denmark            | High           | 40+ threshold    | 69.4%                 | 36.0% (27.2% - 44.7%) | 20.0% (17.3% - 22.8%) | 98 (88,109)             | 98 (88,108)   |
| Denmark            | High           | 65+ threshold    | 58.6%                 | 65.8% (54.6% - 71.6%) | 16.0% (13.4% - 18.6%) | 103 (91,113)            | 95 (85,105)   |
| Denmark            | High           | Full sharing     | 53.4%                 | 69.6% (55.9% - 74.6%) | 9.2% (7.1% - 11.3%)   | 112 (98,125)            | 66 (58,75)    |
| Djibouti           | Lower middle   | Default          | 3.8%                  | 73.9% (61.8% - 82.8%) | 73.9% (61.8% - 82.8%) | 210 (148,274)           | 210 (148,274) |
| Djibouti           | Lower middle   | 2 dose threshold | 17.3%                 | 73.9% (61.8% - 82.8%) | 73.9% (61.8% - 82.8%) | 209 (147,273)           | 209 (147,273) |
| Djibouti           | Lower middle   | 40+ threshold    | 36.5%                 | 73.8% (61.8% - 82.7%) | 73.8% (61.8% - 82.7%) | 205 (145,269)           | 205 (145,269) |
| Djibouti           | Lower middle   | 65+ threshold    | 51.0%                 | 73.4% (61.4% - 82.3%) | 73.4% (61.4% - 82.2%) | 186 (128,246)           | 185 (128,246) |
| Djibouti           | Lower middle   | Full sharing     | 53.7%                 | 71.5% (59.7% - 80.2%) | 44.7% (34.5% - 52.0%) | 145 (100,194)           | 91 (63,135)   |
| Dominican Republic | Upper middle   | Default          | 76.9%                 | 40.0% (33.1% - 46.3%) | 40.0% (33.1% - 46.3%) | 162 (137,192)           | 162 (137,192) |
| Dominican Republic | Upper middle   | 2 dose threshold | 80.9%                 | 40.0% (33.0% - 46.3%) | 40.0% (33.0% - 46.3%) | 162 (136,192)           | 162 (136,192) |
| Dominican Republic | Upper middle   | 40+ threshold    | 57.7%                 | 40.2% (33.7% - 46.4%) | 40.0% (33.3% - 46.4%) | 161 (136,191)           | 161 (136,191) |
| Dominican Republic | Upper middle   | 65+ threshold    | 54.1%                 | 41.2% (35.5% - 47.4%) | 37.2% (29.4% - 44.1%) | 158 (133,190)           | 155 (131,185) |
| Dominican Republic | Upper middle   | Full sharing     | 53.7%                 | 36.9% (29.8% - 43.9%) | 27.2% (18.6% - 42.4%) | 136 (114,165)           | 104 (78,145)  |
| Ecuador            | Upper middle   | Default          | 33.2%                 | 78.6% (73.2% - 84.9%) | 78.6% (73.2% - 84.9%) | 477 (359,639)           | 477 (359,639) |
| Ecuador            | Upper middle   | 2 dose threshold | 43.2%                 | 78.6% (73.1% - 84.9%) | 78.6% (73.2% - 84.9%) | 476 (359,638)           | 476 (358,638) |
| Ecuador            | Upper middle   | 40+ threshold    | 50.3%                 | 78.4% (72.7% - 84.7%) | 78.4% (72.7% - 84.7%) | 473 (356,632)           | 473 (356,632) |
| Ecuador            | Upper middle   | 65+ threshold    | 52.7%                 | 77.1% (70.7% - 83.5%) | 76.4% (69.2% - 82.8%) | 440 (331,592)           | 439 (330,589) |
| Ecuador            | Upper middle   | Full sharing     | 53.7%                 | 74.7% (67.0% - 81.0%) | 64.1% (60.2% - 66.4%) | 396 (303,523)           | 339 (259,460) |
| Egypt              | Lower middle   | Default          | 6.3%                  | 53.5% (40.8% - 66.1%) | 53.5% (40.8% - 66.1%) | 159 (120,212)           | 159 (120,212) |
| Egypt              | Lower middle   | 2 dose threshold | 19.5%                 | 53.5% (40.7% - 66.1%) | 53.5% (40.7% - 66.1%) | 158 (119,211)           | 158 (119,211) |
| Egypt              | Lower middle   | 40+ threshold    | 38.6%                 | 53.0% (39.9% - 65.9%) | 52.9% (39.8% - 65.9%) | 154 (117,203)           | 154 (117,203) |
| Egypt              | Lower middle   | 65+ threshold    | 51.5%                 | 49.4% (35.7% - 63.4%) | 49.7% (37.5% - 62.2%) | 130 (99,168)            | 130 (98,172)  |
| Egypt              | Lower middle   | Full sharing     | 53.9%                 | 44.8% (31.9% - 57.4%) | 37.4% (22.9% - 49.6%) | 110 (82,144)            | 93 (74,116)   |
| El Salvador        | Lower middle   | Default          | 44.0%                 | 41.5% (36.8% - 46.8%) | 41.5% (36.8% - 46.8%) | 199 (167,233)           | 199 (167,233) |
| El Salvador        | Lower middle   | 2 dose threshold | 52.7%                 | 41.5% (36.8% - 46.7%) | 41.5% (36.8% - 46.7%) | 199 (166,233)           | 199 (166,233) |
| El Salvador        | Lower middle   | 40+ threshold    | 54.4%                 | 40.0% (35.7% - 44.9%) | 40.0% (35.6% - 44.8%) | 196 (163,229)           | 196 (164,229) |
| El Salvador        | Lower middle   | 65+ threshold    | 52.8%                 | 39.3% (34.7% - 44.6%) | 26.8% (23.6% - 30.0%) | 192 (159,223)           | 177 (147,206) |

| Country           | Income bracket | Strategy         | Proportion vaccinated | Proportion infected   |                       | Mortalities per 100,000 |               |
|-------------------|----------------|------------------|-----------------------|-----------------------|-----------------------|-------------------------|---------------|
|                   |                |                  |                       | unchanged             | adapted               | unchanged               | adapted       |
| El Salvador       | Lower middle   | Full sharing     | 53.7%                 | 29.3% (25.3% - 35.7%) | 16.7% (13.7% - 20.4%) | 159 (133,186)           | 104 (87,127)  |
| Equatorial Guinea | Upper middle   | Default          | 20.6%                 | 62.0% (53.8% - 70.2%) | 62.0% (53.8% - 70.2%) | 82 (67,99)              | 82 (67,99)    |
| Equatorial Guinea | Upper middle   | 2 dose threshold | 32.0%                 | 61.9% (53.7% - 70.2%) | 61.9% (53.7% - 70.2%) | 82 (66,98)              | 82 (66,98)    |
| Equatorial Guinea | Upper middle   | 40+ threshold    | 45.3%                 | 61.5% (53.1% - 69.8%) | 61.5% (53.0% - 69.8%) | 80 (65,97)              | 80 (65,97)    |
| Equatorial Guinea | Upper middle   | 65+ threshold    | 51.8%                 | 58.5% (50.3% - 66.9%) | 59.0% (49.6% - 67.8%) | 70 (55,88)              | 70 (54,87)    |
| Equatorial Guinea | Upper middle   | Full sharing     | 54.2%                 | 52.4% (46.1% - 57.7%) | 46.4% (40.3% - 48.9%) | 58 (46,72)              | 54 (42,67)    |
| Estonia           | High           | Default          | 61.8%                 | 42.3% (38.4% - 46.2%) | 42.3% (38.4% - 46.2%) | 141 (123,167)           | 141 (123,167) |
| Estonia           | High           | 2 dose threshold | 67.6%                 | 41.9% (37.9% - 45.8%) | 41.8% (37.8% - 45.8%) | 141 (123,167)           | 141 (123,167) |
| Estonia           | High           | 40+ threshold    | 69.2%                 | 40.7% (36.7% - 44.9%) | 38.7% (34.1% - 42.8%) | 140 (122,166)           | 140 (121,165) |
| Estonia           | High           | 65+ threshold    | 58.6%                 | 54.7% (51.5% - 57.9%) | 48.1% (33.1% - 55.0%) | 147 (127,175)           | 145 (125,173) |
| Estonia           | High           | Full sharing     | 52.9%                 | 58.9% (53.2% - 63.2%) | 16.0% (11.6% - 21.6%) | 169 (144,202)           | 69 (57,80)    |
| Eswatini          | Lower middle   | Default          | 6.0%                  | 82.5% (76.0% - 86.8%) | 82.5% (76.0% - 86.8%) | 242 (185,323)           | 242 (185,323) |
| Eswatini          | Lower middle   | 2 dose threshold | 19.4%                 | 82.5% (75.9% - 86.7%) | 82.5% (75.9% - 86.7%) | 241 (184,322)           | 241 (184,322) |
| Eswatini          | Lower middle   | 40+ threshold    | 39.1%                 | 81.5% (74.7% - 86.3%) | 81.5% (74.9% - 86.3%) | 228 (176,300)           | 228 (176,300) |
| Eswatini          | Lower middle   | 65+ threshold    | 51.9%                 | 74.1% (63.4% - 82.7%) | 57.9% (47.1% - 74.7%) | 198 (152,256)           | 185 (146,239) |
| Eswatini          | Lower middle   | Full sharing     | 54.6%                 | 62.9% (49.4% - 77.4%) | 52.2% (36.9% - 62.1%) | 169 (133,216)           | 154 (122,184) |
| Finland           | High           | Default          | 87.1%                 | 16.1% (13.4% - 19.6%) | 16.1% (13.4% - 19.6%) | 135 (115,153)           | 135 (115,153) |
| Finland           | High           | 2 dose threshold | 89.8%                 | 15.6% (13.0% - 18.8%) | 15.5% (13.0% - 18.7%) | 134 (115,153)           | 134 (115,153) |
| Finland           | High           | 40+ threshold    | 71.3%                 | 34.7% (25.8% - 44.6%) | 12.8% (11.2% - 14.9%) | 135 (115,154)           | 134 (114,153) |
| Finland           | High           | 65+ threshold    | 59.8%                 | 68.0% (61.7% - 71.6%) | 10.1% (8.6% - 12.0%)  | 168 (141,196)           | 130 (112,149) |
| Finland           | High           | Full sharing     | 52.7%                 | 74.9% (72.0% - 77.9%) | 3.9% (3.4% - 4.5%)    | 199 (158,234)           | 65 (55,75)    |
| France            | High           | Default          | 78.3%                 | 41.7% (37.2% - 46.1%) | 41.7% (37.2% - 46.1%) | 224 (189,252)           | 224 (189,252) |
| France            | High           | 2 dose threshold | 81.9%                 | 41.7% (37.1% - 46.1%) | 41.7% (37.1% - 46.1%) | 224 (189,252)           | 224 (189,252) |
| France            | High           | 40+ threshold    | 70.8%                 | 41.3% (36.7% - 45.7%) | 41.2% (36.7% - 45.6%) | 223 (188,252)           | 223 (188,252) |
| France            | High           | 65+ threshold    | 58.8%                 | 44.1% (38.7% - 49.6%) | 40.8% (34.6% - 47.0%) | 225 (190,254)           | 221 (188,248) |
| France            | High           | Full sharing     | 52.8%                 | 43.0% (37.2% - 49.3%) | 23.1% (18.0% - 40.1%) | 248 (207,279)           | 162 (138,226) |
| Gabon             | Upper middle   | Default          | 3.5%                  | 51.2% (44.0% - 59.2%) | 51.2% (44.0% - 59.2%) | 89 (69,111)             | 89 (69,111)   |
| Gabon             | Upper middle   | 2 dose threshold | 17.0%                 | 50.9% (43.7% - 58.8%) | 50.8% (43.6% - 58.8%) | 87 (67,109)             | 87 (67,109)   |
| Gabon             | Upper middle   | 40+ threshold    | 36.6%                 | 45.6% (37.8% - 53.0%) | 44.7% (37.0% - 51.6%) | 67 (51,83)              | 66 (51,82)    |
| Gabon             | Upper middle   | 65+ threshold    | 51.3%                 | 32.9% (27.8% - 38.6%) | 32.0% (27.3% - 37.6%) | 57 (44,71)              | 57 (44,70)    |
| Gabon             | Upper middle   | Full sharing     | 54.1%                 | 31.3% (26.6% - 36.7%) | 20.8% (14.0% - 37.4%) | 48 (37,60)              | 32 (24,42)    |
| Gambia            | Low            | Default          | 2.7%                  | 75.2% (64.8% - 82.8%) | 75.2% (64.8% - 82.8%) | 169 (125,235)           | 169 (125,235) |
| Gambia            | Low            | 2 dose threshold | 16.5%                 | 75.2% (64.7% - 82.7%) | 75.2% (64.7% - 82.8%) | 168 (124,233)           | 168 (124,233) |
| Gambia            | Low            | 40+ threshold    | 36.6%                 | 74.0% (63.5% - 81.8%) | 74.0% (63.2% - 81.8%) | 150 (112,206)           | 150 (112,206) |
| Gambia            | Low            | 65+ threshold    | 51.9%                 | 61.2% (50.1% - 71.2%) | 50.2% (40.6% - 58.3%) | 114 (87,151)            | 108 (83,144)  |

| Country       | Income bracket | Strategy         | Proportion vaccinated | Proportion infected   |                       | Mortalities per 100,000 |               |
|---------------|----------------|------------------|-----------------------|-----------------------|-----------------------|-------------------------|---------------|
|               |                |                  |                       | unchanged             | adapted               | unchanged               | adapted       |
| Gambia        | Low            | Full sharing     | 54.5%                 | 51.1% (41.1% - 60.1%) | 40.0% (31.0% - 53.1%) | 93 (71,123)             | 73 (54,116)   |
| Georgia       | Upper middle   | Default          | 6.2%                  | 88.9% (87.5% - 90.2%) | 88.9% (87.5% - 90.2%) | 505 (437,587)           | 505 (437,587) |
| Georgia       | Upper middle   | 2 dose threshold | 19.0%                 | 88.9% (87.5% - 90.1%) | 88.9% (87.5% - 90.1%) | 505 (436,586)           | 505 (436,586) |
| Georgia       | Upper middle   | 40+ threshold    | 38.2%                 | 88.7% (87.2% - 90.1%) | 88.5% (87.1% - 89.8%) | 491 (425,568)           | 491 (425,568) |
| Georgia       | Upper middle   | 65+ threshold    | 51.2%                 | 87.6% (85.7% - 89.2%) | 83.5% (76.6% - 87.7%) | 451 (395,519)           | 444 (392,513) |
| Georgia       | Upper middle   | Full sharing     | 53.1%                 | 87.3% (84.7% - 89.5%) | 71.4% (67.0% - 76.5%) | 421 (369,485)           | 384 (334,452) |
| Germany       | High           | Default          | 79.9%                 | 17.4% (15.8% - 19.1%) | 17.4% (15.8% - 19.1%) | 124 (118,131)           | 124 (118,131) |
| Germany       | High           | 2 dose threshold | 83.5%                 | 17.4% (15.7% - 19.0%) | 17.4% (15.7% - 19.0%) | 124 (118,131)           | 124 (118,131) |
| Germany       | High           | 40+ threshold    | 72.7%                 | 17.6% (15.8% - 19.1%) | 17.0% (15.5% - 18.7%) | 124 (118,130)           | 124 (118,130) |
| Germany       | High           | 65+ threshold    | 58.5%                 | 35.4% (26.9% - 45.5%) | 20.5% (15.3% - 29.1%) | 125 (118,133)           | 125 (117,135) |
| Germany       | High           | Full sharing     | 52.9%                 | 37.4% (29.2% - 44.6%) | 11.0% (8.0% - 23.7%)  | 138 (131,146)           | 91 (75,156)   |
| Ghana         | Lower middle   | Default          | 5.3%                  | 51.5% (43.3% - 59.2%) | 51.5% (43.3% - 59.2%) | 59 (46,72)              | 59 (46,72)    |
| Ghana         | Lower middle   | 2 dose threshold | 18.7%                 | 49.9% (42.6% - 56.6%) | 49.9% (42.5% - 56.4%) | 57 (45,71)              | 57 (45,71)    |
| Ghana         | Lower middle   | 40+ threshold    | 37.9%                 | 41.1% (35.1% - 46.9%) | 39.8% (34.4% - 45.2%) | 51 (41,61)              | 51 (41,61)    |
| Ghana         | Lower middle   | 65+ threshold    | 52.4%                 | 33.8% (28.0% - 40.0%) | 33.4% (27.6% - 39.7%) | 48 (40,58)              | 48 (39,58)    |
| Ghana         | Lower middle   | Full sharing     | 54.3%                 | 33.2% (27.4% - 39.4%) | 16.4% (12.8% - 19.9%) | 43 (35,52)              | 21 (17,25)    |
| Greece        | High           | Default          | 66.7%                 | 27.6% (25.2% - 30.4%) | 27.6% (25.2% - 30.4%) | 142 (138,146)           | 142 (138,146) |
| Greece        | High           | 2 dose threshold | 72.0%                 | 26.8% (24.5% - 29.5%) | 26.8% (24.5% - 29.4%) | 142 (138,146)           | 142 (138,146) |
| Greece        | High           | 40+ threshold    | 70.5%                 | 25.8% (23.3% - 28.7%) | 23.0% (20.0% - 25.9%) | 140 (136,144)           | 140 (137,144) |
| Greece        | High           | 65+ threshold    | 58.5%                 | 40.0% (31.7% - 47.2%) | 27.5% (17.5% - 38.1%) | 132 (130,135)           | 136 (126,147) |
| Greece        | High           | Full sharing     | 52.7%                 | 46.8% (27.8% - 54.6%) | 9.5% (6.2% - 14.6%)   | 158 (151,166)           | 79 (60,106)   |
| Guatemala     | Upper middle   | Default          | 8.1%                  | 69.2% (64.2% - 73.1%) | 69.2% (64.2% - 73.1%) | 259 (203,331)           | 259 (203,331) |
| Guatemala     | Upper middle   | 2 dose threshold | 21.1%                 | 69.1% (64.2% - 73.1%) | 69.1% (64.2% - 73.1%) | 257 (201,329)           | 257 (201,329) |
| Guatemala     | Upper middle   | 40+ threshold    | 39.1%                 | 68.5% (63.5% - 72.5%) | 68.5% (63.5% - 72.5%) | 242 (190,308)           | 242 (190,307) |
| Guatemala     | Upper middle   | 65+ threshold    | 51.8%                 | 61.5% (55.6% - 66.2%) | 59.5% (52.2% - 65.1%) | 176 (140,217)           | 173 (136,214) |
| Guatemala     | Upper middle   | Full sharing     | 54.1%                 | 53.4% (44.5% - 60.9%) | 39.5% (32.1% - 50.8%) | 140 (111,170)           | 113 (93,133)  |
| Guinea        | Low            | Default          | 6.4%                  | 64.0% (56.2% - 69.9%) | 64.0% (56.2% - 69.9%) | 50 (36,69)              | 50 (36,69)    |
| Guinea        | Low            | 2 dose threshold | 19.8%                 | 63.9% (56.1% - 69.9%) | 63.9% (56.1% - 69.9%) | 50 (36,69)              | 50 (36,69)    |
| Guinea        | Low            | 40+ threshold    | 38.3%                 | 62.5% (54.8% - 68.8%) | 62.5% (54.9% - 68.7%) | 46 (33,62)              | 46 (33,62)    |
| Guinea        | Low            | 65+ threshold    | 52.0%                 | 50.3% (42.0% - 58.8%) | 45.1% (35.0% - 54.8%) | 36 (27,47)              | 35 (27,46)    |
| Guinea        | Low            | Full sharing     | 54.6%                 | 43.8% (34.7% - 53.2%) | 41.7% (26.7% - 51.4%) | 29 (23,38)              | 27 (21,36)    |
| Guinea-Bissau | Low            | Default          | 2.3%                  | 69.3% (62.5% - 75.1%) | 69.3% (62.5% - 75.1%) | 81 (59,104)             | 81 (59,104)   |
| Guinea-Bissau | Low            | 2 dose threshold | 16.2%                 | 69.3% (62.4% - 75.0%) | 69.3% (62.4% - 75.0%) | 81 (58,104)             | 81 (58,104)   |
| Guinea-Bissau | Low            | 40+ threshold    | 36.1%                 | 68.4% (61.3% - 74.5%) | 68.4% (61.4% - 74.5%) | 74 (55,94)              | 74 (55,94)    |
| Guinea-Bissau | Low            | 65+ threshold    | 51.9%                 | 58.7% (48.3% - 69.4%) | 55.9% (45.2% - 69.2%) | 56 (41,70)              | 55 (41,69)    |

| Country       | Income bracket | Strategy         | Proportion vaccinated | Proportion infected   |                       | Mortalities per 100,000 |               |
|---------------|----------------|------------------|-----------------------|-----------------------|-----------------------|-------------------------|---------------|
|               |                |                  |                       | unchanged             | adapted               | unchanged               | adapted       |
| Guinea-Bissau | Low            | Full sharing     | 54.5%                 | 51.6% (43.4% - 61.6%) | 48.8% (39.5% - 52.0%) | 49 (37,62)              | 46 (35,62)    |
| Guyana        | Upper middle   | Default          | 49.8%                 | 51.5% (41.8% - 61.2%) | 51.5% (41.8% - 61.2%) | 154 (124,192)           | 154 (124,192) |
| Guyana        | Upper middle   | 2 dose threshold | 57.2%                 | 51.3% (41.6% - 61.0%) | 51.3% (41.6% - 61.0%) | 153 (124,191)           | 153 (124,191) |
| Guyana        | Upper middle   | 40+ threshold    | 57.8%                 | 52.2% (42.2% - 62.4%) | 49.5% (40.9% - 59.2%) | 151 (122,188)           | 150 (122,188) |
| Guyana        | Upper middle   | 65+ threshold    | 53.1%                 | 61.3% (48.4% - 71.6%) | 57.7% (43.9% - 67.8%) | 148 (121,180)           | 147 (118,188) |
| Guyana        | Upper middle   | Full sharing     | 53.7%                 | 63.3% (44.5% - 73.5%) | 25.3% (15.2% - 38.1%) | 127 (106,150)           | 80 (55,112)   |
| Honduras      | Lower middle   | Default          | 14.0%                 | 82.8% (78.9% - 86.2%) | 82.8% (78.9% - 86.2%) | 314 (240,405)           | 314 (240,405) |
| Honduras      | Lower middle   | 2 dose threshold | 26.7%                 | 82.8% (78.9% - 86.1%) | 82.7% (78.9% - 86.1%) | 313 (239,404)           | 313 (239,404) |
| Honduras      | Lower middle   | 40+ threshold    | 40.5%                 | 82.3% (78.4% - 85.7%) | 82.2% (78.4% - 85.6%) | 297 (228,384)           | 297 (228,384) |
| Honduras      | Lower middle   | 65+ threshold    | 51.6%                 | 78.2% (73.1% - 81.6%) | 75.7% (70.2% - 81.1%) | 237 (184,302)           | 234 (183,296) |
| Honduras      | Lower middle   | Full sharing     | 53.9%                 | 74.7% (66.9% - 80.6%) | 62.1% (57.4% - 67.7%) | 197 (155,248)           | 168 (131,213) |
| Hungary       | High           | Default          | 80.7%                 | 51.5% (45.9% - 57.3%) | 51.5% (45.9% - 57.3%) | 232 (202,268)           | 232 (202,268) |
| Hungary       | High           | 2 dose threshold | 83.7%                 | 51.5% (45.9% - 57.2%) | 51.5% (45.9% - 57.2%) | 232 (202,268)           | 232 (202,268) |
| Hungary       | High           | 40+ threshold    | 71.4%                 | 52.6% (46.7% - 58.1%) | 51.4% (45.9% - 57.0%) | 232 (202,268)           | 232 (202,268) |
| Hungary       | High           | 65+ threshold    | 58.4%                 | 68.7% (60.6% - 74.5%) | 54.7% (46.9% - 62.8%) | 234 (201,269)           | 232 (200,267) |
| Hungary       | High           | Full sharing     | 52.7%                 | 67.3% (52.9% - 75.4%) | 43.1% (31.1% - 52.3%) | 257 (221,298)           | 203 (175,243) |
| Iceland       | High           | Default          | 100.0%                | 19.7% (12.9% - 25.5%) | 19.7% (12.9% - 25.5%) | 21 (20,22)              | 21 (20,22)    |
| Iceland       | High           | 2 dose threshold | 93.4%                 | 47.4% (22.6% - 59.0%) | 10.1% (7.2% - 13.1%)  | 21 (20,22)              | 21 (20,22)    |
| Iceland       | High           | 40+ threshold    | 66.8%                 | 99.0% (96.5% - 99.9%) | 7.7% (6.0% - 10.1%)   | 28 (22,36)              | 20 (20,21)    |
| Iceland       | High           | 65+ threshold    | 57.1%                 | 90.8% (70.1% - 99.4%) | 6.3% (4.8% - 7.9%)    | 43 (34,54)              | 19 (19,20)    |
| Iceland       | High           | Full sharing     | 54.2%                 | 92.3% (70.6% - 99.6%) | 3.3% (2.6% - 4.1%)    | 45 (34,56)              | 12 (11,12)    |
| India         | Lower middle   | Default          | 33.3%                 | 68.6% (64.0% - 72.5%) | 68.6% (64.0% - 72.5%) | 198 (170,223)           | 198 (170,223) |
| India         | Lower middle   | 2 dose threshold | 43.3%                 | 68.5% (64.0% - 72.5%) | 68.5% (64.0% - 72.5%) | 197 (170,223)           | 197 (170,223) |
| India         | Lower middle   | 40+ threshold    | 50.0%                 | 68.4% (63.8% - 72.3%) | 68.4% (63.8% - 72.3%) | 196 (168,221)           | 196 (168,221) |
| India         | Lower middle   | 65+ threshold    | 52.9%                 | 67.2% (62.8% - 70.9%) | 66.7% (62.5% - 70.6%) | 179 (154,203)           | 179 (153,203) |
| India         | Lower middle   | Full sharing     | 53.8%                 | 64.6% (60.6% - 68.1%) | 41.9% (38.5% - 46.4%) | 157 (134,178)           | 105 (85,125)  |
| Indonesia     | Upper middle   | Default          | 18.8%                 | 70.8% (61.6% - 78.1%) | 70.8% (61.6% - 78.1%) | 134 (97,184)            | 134 (97,184)  |
| Indonesia     | Upper middle   | 2 dose threshold | 30.6%                 | 70.7% (61.4% - 78.1%) | 70.7% (61.5% - 78.1%) | 134 (97,183)            | 134 (97,183)  |
| Indonesia     | Upper middle   | 40+ threshold    | 44.8%                 | 69.8% (60.1% - 77.2%) | 69.8% (59.9% - 77.5%) | 128 (94,173)            | 128 (94,173)  |
| Indonesia     | Upper middle   | 65+ threshold    | 52.6%                 | 61.8% (49.7% - 71.1%) | 34.6% (27.4% - 41.3%) | 103 (77,134)            | 82 (63,106)   |
| Indonesia     | Upper middle   | Full sharing     | 53.6%                 | 47.4% (32.9% - 63.0%) | 20.6% (14.0% - 38.4%) | 83 (65,105)             | 46 (35,59)    |
| Iran          | Upper middle   | Default          | 8.0%                  | 72.4% (66.7% - 76.6%) | 72.4% (66.7% - 76.6%) | 265 (213,338)           | 265 (213,338) |
| Iran          | Upper middle   | 2 dose threshold | 20.9%                 | 72.3% (66.7% - 76.5%) | 72.3% (66.7% - 76.5%) | 264 (212,337)           | 264 (212,337) |
| Iran          | Upper middle   | 40+ threshold    | 39.7%                 | 71.5% (65.8% - 75.8%) | 71.4% (65.7% - 75.6%) | 253 (204,320)           | 252 (204,320) |
| Iran          | Upper middle   | 65+ threshold    | 51.1%                 | 66.6% (58.9% - 72.0%) | 63.4% (54.2% - 70.3%) | 206 (169,250)           | 202 (166,243) |

| Country | Income bracket | Strategy         | Proportion vaccinated | Proportion infected   |                       | Mortalities per 100,000 |               |
|---------|----------------|------------------|-----------------------|-----------------------|-----------------------|-------------------------|---------------|
|         |                |                  |                       | unchanged             | adapted               | unchanged               | adapted       |
| Iran    | Upper middle   | Full sharing     | 53.5%                 | 62.0% (51.1% - 70.6%) | 48.0% (35.7% - 54.1%) | 173 (144,208)           | 146 (121,178) |
| Iraq    | Upper middle   | Default          | 3.2%                  | 82.1% (74.1% - 88.7%) | 82.1% (74.1% - 88.7%) | 349 (278,449)           | 349 (278,449) |
| Iraq    | Upper middle   | 2 dose threshold | 17.0%                 | 82.1% (74.1% - 88.7%) | 82.1% (74.1% - 88.7%) | 346 (276,446)           | 346 (276,446) |
| Iraq    | Upper middle   | 40+ threshold    | 36.4%                 | 81.7% (73.7% - 88.0%) | 81.7% (73.7% - 87.9%) | 329 (260,424)           | 329 (260,424) |
| Iraq    | Upper middle   | 65+ threshold    | 51.7%                 | 77.2% (69.1% - 83.1%) | 74.6% (66.5% - 78.5%) | 235 (180,319)           | 229 (166,312) |
| Iraq    | Upper middle   | Full sharing     | 54.4%                 | 69.4% (61.3% - 77.3%) | 51.1% (45.2% - 57.7%) | 197 (163,250)           | 177 (148,213) |
| Ireland | High           | Default          | 82.6%                 | 37.1% (32.5% - 42.1%) | 37.1% (32.5% - 42.1%) | 103 (100,105)           | 103 (100,105) |
| Ireland | High           | 2 dose threshold | 85.8%                 | 36.0% (31.6% - 40.6%) | 35.9% (31.6% - 40.5%) | 103 (100,105)           | 103 (100,105) |
| Ireland | High           | 40+ threshold    | 66.8%                 | 61.1% (55.0% - 69.2%) | 20.9% (17.2% - 27.5%) | 111 (105,115)           | 99 (97,102)   |
| Ireland | High           | 65+ threshold    | 56.9%                 | 70.5% (60.0% - 79.7%) | 19.1% (16.9% - 21.1%) | 137 (122,148)           | 98 (94,102)   |
| Ireland | High           | Full sharing     | 53.2%                 | 71.8% (65.3% - 79.7%) | 9.7% (8.0% - 11.4%)   | 152 (133,164)           | 57 (54,65)    |
| Israel  | High           | Default          | 100.0%                | 33.4% (30.5% - 36.7%) | 33.4% (30.5% - 36.7%) | 55 (51,58)              | 55 (51,58)    |
| Israel  | High           | 2 dose threshold | 88.8%                 | 59.2% (52.7% - 64.2%) | 35.9% (31.8% - 41.9%) | 74 (63,84)              | 55 (49,59)    |
| Israel  | High           | 40+ threshold    | 70.9%                 | 64.4% (56.0% - 70.3%) | 57.2% (51.3% - 63.0%) | 76 (64,86)              | 69 (62,79)    |
| Israel  | High           | 65+ threshold    | 68.2%                 | 63.6% (53.5% - 70.5%) | 57.6% (52.5% - 63.0%) | 77 (63,87)              | 70 (62,79)    |
| Israel  | High           | Full sharing     | 66.1%                 | 56.2% (41.5% - 67.9%) | 25.2% (18.8% - 32.1%) | 74 (60,88)              | 50 (46,53)    |
| Italy   | High           | Default          | 80.5%                 | 34.0% (30.6% - 36.9%) | 34.0% (30.6% - 36.9%) | 305 (279,337)           | 305 (279,337) |
| Italy   | High           | 2 dose threshold | 84.1%                 | 34.0% (30.5% - 36.9%) | 34.0% (30.5% - 37.0%) | 305 (279,337)           | 305 (279,337) |
| Italy   | High           | 40+ threshold    | 73.2%                 | 33.6% (30.2% - 36.5%) | 33.5% (30.1% - 36.4%) | 304 (278,336)           | 304 (278,336) |
| Italy   | High           | 65+ threshold    | 59.2%                 | 34.4% (30.8% - 37.4%) | 33.5% (29.3% - 37.0%) | 303 (278,333)           | 301 (274,334) |
| Italy   | High           | Full sharing     | 52.7%                 | 34.4% (30.3% - 38.4%) | 22.0% (16.5% - 41.3%) | 334 (304,372)           | 242 (199,382) |
| Jamaica | Upper middle   | Default          | 9.4%                  | 34.3% (29.6% - 39.3%) | 34.3% (29.6% - 39.3%) | 136 (115,160)           | 136 (115,160) |
| Jamaica | Upper middle   | 2 dose threshold | 22.1%                 | 34.2% (29.4% - 39.2%) | 34.2% (29.4% - 39.2%) | 135 (115,159)           | 135 (115,159) |
| Jamaica | Upper middle   | 40+ threshold    | 40.7%                 | 32.9% (28.2% - 38.0%) | 32.8% (28.0% - 37.8%) | 125 (106,147)           | 125 (106,147) |
| Jamaica | Upper middle   | 65+ threshold    | 52.0%                 | 26.3% (22.0% - 31.2%) | 24.6% (19.9% - 29.6%) | 97 (82,112)             | 93 (78,110)   |
| Jamaica | Upper middle   | Full sharing     | 53.4%                 | 18.7% (14.9% - 23.3%) | 6.5% (5.0% - 8.5%)    | 74 (63,86)              | 30 (26,37)    |
| Japan   | High           | Default          | 37.6%                 | 10.3% (8.0% - 12.3%)  | 10.3% (8.0% - 12.3%)  | 75 (62,93)              | 75 (62,93)    |
| Japan   | High           | 2 dose threshold | 47.1%                 | 10.2% (7.9% - 12.3%)  | 10.2% (7.9% - 12.2%)  | 74 (62,92)              | 74 (62,92)    |
| Japan   | High           | 40+ threshold    | 63.1%                 | 9.6% (7.3% - 11.5%)   | 9.6% (7.4% - 11.5%)   | 68 (57,84)              | 68 (57,85)    |
| Japan   | High           | 65+ threshold    | 54.5%                 | 6.0% (4.4% - 7.3%)    | 5.6% (4.3% - 6.8%)    | 43 (36,53)              | 41 (35,52)    |
| Japan   | High           | Full sharing     | 52.5%                 | 4.5% (3.4% - 5.3%)    | 3.1% (1.8% - 7.4%)    | 35 (28,43)              | 21 (15,32)    |
| Jordan  | Upper middle   | Default          | 43.8%                 | 69.7% (64.2% - 74.1%) | 69.7% (64.2% - 74.1%) | 168 (126,225)           | 168 (126,225) |
| Jordan  | Upper middle   | 2 dose threshold | 52.6%                 | 69.7% (64.2% - 74.1%) | 69.7% (64.2% - 74.1%) | 167 (126,225)           | 167 (126,225) |
| Jordan  | Upper middle   | 40+ threshold    | 50.5%                 | 69.7% (64.1% - 74.1%) | 69.7% (64.1% - 74.1%) | 166 (125,222)           | 166 (125,222) |
| Jordan  | Upper middle   | 65+ threshold    | 52.7%                 | 69.3% (63.8% - 73.7%) | 69.3% (63.8% - 73.6%) | 157 (117,211)           | 157 (117,211) |

| Country    | Income bracket | Strategy         | Proportion vaccinated | Proportion infected   |                       | Mortalities per 100,000 |               |
|------------|----------------|------------------|-----------------------|-----------------------|-----------------------|-------------------------|---------------|
|            |                |                  |                       | unchanged             | adapted               | unchanged               | adapted       |
| Jordan     | Upper middle   | Full sharing     | 54.2%                 | 68.1% (62.7% - 72.3%) | 47.6% (36.9% - 53.6%) | 134 (99,181)            | 89 (67,106)   |
| Kazakhstan | Upper middle   | Default          | 32.3%                 | 63.0% (56.4% - 68.9%) | 63.0% (56.4% - 68.9%) | 286 (234,354)           | 286 (234,354) |
| Kazakhstan | Upper middle   | 2 dose threshold | 42.6%                 | 62.9% (56.3% - 68.9%) | 62.9% (56.4% - 68.9%) | 285 (233,352)           | 285 (233,353) |
| Kazakhstan | Upper middle   | 40+ threshold    | 51.4%                 | 62.4% (55.9% - 68.4%) | 62.4% (55.9% - 68.3%) | 275 (226,341)           | 275 (225,341) |
| Kazakhstan | Upper middle   | 65+ threshold    | 52.1%                 | 58.0% (50.9% - 64.7%) | 51.4% (43.3% - 60.0%) | 222 (184,268)           | 201 (166,241) |
| Kazakhstan | Upper middle   | Full sharing     | 53.7%                 | 49.6% (40.5% - 61.1%) | 27.0% (18.9% - 43.5%) | 179 (150,214)           | 125 (95,223)  |
| Kenya      | Lower middle   | Default          | 3.6%                  | 84.0% (80.2% - 87.3%) | 84.0% (80.2% - 87.3%) | 113 (90,136)            | 113 (90,136)  |
| Kenya      | Lower middle   | 2 dose threshold | 17.3%                 | 84.0% (80.1% - 87.3%) | 84.0% (80.1% - 87.3%) | 112 (89,135)            | 112 (89,135)  |
| Kenya      | Lower middle   | 40+ threshold    | 37.2%                 | 83.3% (79.4% - 86.6%) | 83.3% (79.4% - 86.5%) | 108 (86,130)            | 108 (86,130)  |
| Kenya      | Lower middle   | 65+ threshold    | 52.1%                 | 78.2% (72.8% - 83.2%) | 74.6% (67.5% - 80.6%) | 93 (74,111)             | 91 (73,109)   |
| Kenya      | Lower middle   | Full sharing     | 54.5%                 | 74.2% (65.3% - 81.4%) | 63.4% (55.4% - 71.4%) | 76 (61,91)              | 64 (51,79)    |
| Kuwait     | High           | Default          | 71.8%                 | 62.1% (50.5% - 71.8%) | 62.1% (50.5% - 71.8%) | 62 (45,83)              | 62 (45,83)    |
| Kuwait     | High           | 2 dose threshold | 76.3%                 | 62.1% (50.5% - 71.8%) | 62.1% (50.5% - 71.8%) | 62 (45,83)              | 62 (45,83)    |
| Kuwait     | High           | 40+ threshold    | 60.1%                 | 63.9% (52.0% - 73.0%) | 64.5% (54.4% - 73.6%) | 63 (45,84)              | 63 (45,85)    |
| Kuwait     | High           | 65+ threshold    | 52.4%                 | 72.9% (66.1% - 77.6%) | 64.0% (50.6% - 73.0%) | 71 (50,101)             | 66 (48,89)    |
| Kuwait     | High           | Full sharing     | 53.7%                 | 66.7% (56.1% - 74.4%) | 52.0% (32.7% - 63.2%) | 64 (46,88)              | 53 (40,73)    |
| Kyrgyzstan | Lower middle   | Default          | 5.0%                  | 97.1% (94.5% - 98.3%) | 97.1% (94.5% - 98.3%) | 207 (151,335)           | 207 (151,335) |
| Kyrgyzstan | Lower middle   | 2 dose threshold | 18.6%                 | 97.1% (94.2% - 98.3%) | 97.1% (94.1% - 98.3%) | 206 (151,332)           | 206 (151,332) |
| Kyrgyzstan | Lower middle   | 40+ threshold    | 37.3%                 | 96.8% (92.3% - 98.2%) | 96.7% (92.1% - 98.2%) | 201 (150,305)           | 201 (150,305) |
| Kyrgyzstan | Lower middle   | 65+ threshold    | 51.3%                 | 95.2% (86.0% - 97.6%) | 91.1% (79.9% - 96.0%) | 190 (148,251)           | 188 (147,236) |
| Kyrgyzstan | Lower middle   | Full sharing     | 53.9%                 | 94.2% (80.1% - 97.3%) | 87.8% (79.9% - 95.7%) | 184 (147,234)           | 177 (145,212) |
| Latvia     | High           | Default          | 49.1%                 | 59.8% (53.3% - 65.9%) | 59.8% (53.3% - 65.9%) | 219 (175,264)           | 219 (175,264) |
| Latvia     | High           | 2 dose threshold | 56.6%                 | 59.4% (52.8% - 65.6%) | 59.3% (52.8% - 65.5%) | 219 (175,264)           | 219 (175,264) |
| Latvia     | High           | 40+ threshold    | 65.9%                 | 56.6% (49.7% - 63.3%) | 55.0% (48.6% - 62.0%) | 215 (173,259)           | 215 (173,259) |
| Latvia     | High           | 65+ threshold    | 56.6%                 | 61.0% (53.7% - 67.2%) | 45.6% (36.5% - 53.2%) | 213 (172,253)           | 201 (163,241) |
| Latvia     | High           | Full sharing     | 53.0%                 | 61.4% (51.2% - 68.9%) | 20.4% (14.9% - 27.5%) | 215 (175,259)           | 110 (91,140)  |
| Liberia    | Low            | Default          | 3.1%                  | 64.9% (58.1% - 69.9%) | 64.9% (58.1% - 69.9%) | 77 (55,109)             | 77 (55,109)   |
| Liberia    | Low            | 2 dose threshold | 16.9%                 | 64.8% (58.0% - 69.8%) | 64.8% (58.1% - 69.9%) | 76 (55,108)             | 76 (55,108)   |
| Liberia    | Low            | 40+ threshold    | 36.7%                 | 64.1% (57.4% - 69.2%) | 64.1% (57.1% - 69.4%) | 69 (50,97)              | 69 (50,97)    |
| Liberia    | Low            | 65+ threshold    | 51.9%                 | 54.4% (46.4% - 61.4%) | 36.9% (27.7% - 46.4%) | 42 (32,56)              | 36 (28,46)    |
| Liberia    | Low            | Full sharing     | 54.6%                 | 38.6% (29.9% - 46.0%) | 32.6% (21.2% - 46.6%) | 33 (26,42)              | 31 (24,40)    |
| Libya      | Upper middle   | Default          | 9.4%                  | 79.2% (70.6% - 85.5%) | 79.2% (70.6% - 85.5%) | 244 (180,322)           | 244 (180,322) |
| Libya      | Upper middle   | 2 dose threshold | 22.3%                 | 79.2% (70.5% - 85.5%) | 79.2% (70.5% - 85.5%) | 243 (179,320)           | 243 (179,320) |
| Libya      | Upper middle   | 40+ threshold    | 40.9%                 | 78.2% (69.4% - 84.5%) | 78.2% (69.3% - 84.5%) | 223 (165,292)           | 223 (166,292) |
| Libya      | Upper middle   | 65+ threshold    | 51.2%                 | 70.8% (60.0% - 79.1%) | 60.1% (49.1% - 70.6%) | 173 (131,222)           | 164 (126,209) |



| Country    | Income bracket | Strategy         | Proportion vaccinated | Proportion infected   |                       | Mortalities per 100,000 |               |
|------------|----------------|------------------|-----------------------|-----------------------|-----------------------|-------------------------|---------------|
|            |                |                  |                       | unchanged             | adapted               | unchanged               | adapted       |
| Libya      | Upper middle   | Full sharing     | 53.9%                 | 64.5% (49.9% - 76.0%) | 46.5% (32.6% - 60.4%) | 142 (108,182)           | 107 (85,137)  |
| Lithuania  | High           | Default          | 66.8%                 | 71.3% (63.4% - 77.7%) | 71.3% (63.4% - 77.7%) | 320 (259,389)           | 320 (259,389) |
| Lithuania  | High           | 2 dose threshold | 71.7%                 | 71.0% (63.1% - 77.4%) | 71.0% (63.2% - 77.4%) | 320 (259,389)           | 320 (259,389) |
| Lithuania  | High           | 40+ threshold    | 71.5%                 | 71.0% (63.1% - 77.7%) | 69.7% (61.4% - 76.4%) | 319 (259,388)           | 318 (258,387) |
| Lithuania  | High           | 65+ threshold    | 58.3%                 | 76.6% (70.7% - 81.6%) | 62.1% (54.9% - 69.6%) | 326 (261,401)           | 311 (251,378) |
| Lithuania  | High           | Full sharing     | 53.2%                 | 79.3% (73.4% - 84.7%) | 47.5% (34.8% - 58.9%) | 352 (281,438)           | 284 (230,350) |
| Luxembourg | High           | Default          | 80.8%                 | 38.8% (35.3% - 41.9%) | 38.8% (35.3% - 41.9%) | 324 (287,368)           | 324 (287,368) |
| Luxembourg | High           | 2 dose threshold | 84.8%                 | 38.8% (35.3% - 41.9%) | 38.8% (35.3% - 41.9%) | 324 (287,368)           | 324 (287,368) |
| Luxembourg | High           | 40+ threshold    | 66.9%                 | 38.5% (35.0% - 41.6%) | 38.4% (35.0% - 41.5%) | 323 (286,367)           | 323 (286,367) |
| Luxembourg | High           | 65+ threshold    | 56.3%                 | 43.9% (39.2% - 47.9%) | 38.8% (33.0% - 44.2%) | 324 (287,367)           | 320 (284,364) |
| Luxembourg | High           | Full sharing     | 53.1%                 | 41.0% (34.6% - 46.4%) | 35.5% (32.5% - 39.5%) | 332 (294,377)           | 283 (243,343) |
| Madagascar | Low            | Default          | 1.4%                  | 75.0% (68.0% - 79.5%) | 75.0% (68.0% - 79.5%) | 77 (55,105)             | 77 (55,105)   |
| Madagascar | Low            | 2 dose threshold | 15.4%                 | 75.0% (68.0% - 79.5%) | 75.0% (68.0% - 79.5%) | 77 (54,105)             | 77 (54,105)   |
| Madagascar | Low            | 40+ threshold    | 35.9%                 | 74.6% (67.8% - 79.3%) | 74.6% (67.8% - 79.2%) | 74 (53,100)             | 74 (53,101)   |
| Madagascar | Low            | 65+ threshold    | 51.9%                 | 72.0% (64.9% - 77.6%) | 71.5% (63.9% - 77.4%) | 66 (48,87)              | 65 (48,87)    |
| Madagascar | Low            | Full sharing     | 54.5%                 | 69.0% (60.9% - 76.1%) | 64.4% (57.4% - 69.1%) | 54 (40,72)              | 48 (34,64)    |
| Malawi     | Low            | Default          | 4.1%                  | 81.4% (75.6% - 87.7%) | 81.4% (75.6% - 87.7%) | 50 (41,66)              | 50 (41,66)    |
| Malawi     | Low            | 2 dose threshold | 17.8%                 | 80.5% (75.2% - 85.9%) | 80.5% (75.1% - 85.8%) | 49 (40,65)              | 49 (40,65)    |
| Malawi     | Low            | 40+ threshold    | 37.7%                 | 74.0% (67.1% - 79.4%) | 72.2% (64.7% - 78.1%) | 44 (36,57)              | 44 (36,57)    |
| Malawi     | Low            | 65+ threshold    | 52.2%                 | 59.2% (52.6% - 64.6%) | 58.3% (52.1% - 63.7%) | 42 (34,54)              | 42 (34,54)    |
| Malawi     | Low            | Full sharing     | 54.8%                 | 58.1% (52.0% - 63.5%) | 32.2% (23.6% - 52.2%) | 37 (30,49)              | 18 (15,22)    |
| Malaysia   | Upper middle   | Default          | 31.3%                 | 57.1% (49.9% - 64.6%) | 57.1% (49.9% - 64.6%) | 55 (41,72)              | 55 (41,72)    |
| Malaysia   | Upper middle   | 2 dose threshold | 42.0%                 | 57.1% (49.8% - 64.6%) | 57.0% (49.8% - 64.6%) | 55 (41,71)              | 55 (41,71)    |
| Malaysia   | Upper middle   | 40+ threshold    | 47.6%                 | 56.4% (49.1% - 64.2%) | 56.3% (49.0% - 64.1%) | 50 (37,65)              | 50 (37,65)    |
| Malaysia   | Upper middle   | 65+ threshold    | 52.1%                 | 51.4% (42.3% - 60.5%) | 45.3% (32.5% - 55.2%) | 27 (21,35)              | 26 (18,37)    |
| Malaysia   | Upper middle   | Full sharing     | 53.6%                 | 46.4% (30.9% - 61.3%) | 4.0% (2.7% - 5.9%)    | 20 (15,25)              | 4 (3,5)       |
| Maldives   | Upper middle   | Default          | 90.5%                 | 45.8% (35.5% - 55.4%) | 45.8% (35.5% - 55.4%) | 47 (37,60)              | 47 (37,60)    |
| Maldives   | Upper middle   | 2 dose threshold | 92.0%                 | 45.7% (35.5% - 55.3%) | 45.7% (35.5% - 55.3%) | 47 (37,60)              | 47 (37,60)    |
| Maldives   | Upper middle   | 40+ threshold    | 48.7%                 | 82.2% (76.9% - 85.6%) | 40.9% (25.9% - 56.5%) | 67 (47,96)              | 43 (35,57)    |
| Maldives   | Upper middle   | 65+ threshold    | 52.3%                 | 92.7% (89.9% - 94.7%) | 50.3% (37.1% - 60.9%) | 102 (64,163)            | 48 (37,62)    |
| Maldives   | Upper middle   | Full sharing     | 53.3%                 | 89.6% (87.0% - 92.6%) | 20.6% (10.9% - 42.8%) | 83 (54,131)             | 23 (19,35)    |
| Mali       | Low            | Default          | 1.5%                  | 56.0% (46.5% - 64.4%) | 56.0% (46.5% - 64.4%) | 91 (67,126)             | 91 (67,126)   |
| Mali       | Low            | 2 dose threshold | 15.6%                 | 55.6% (46.0% - 64.2%) | 55.6% (46.0% - 64.1%) | 90 (67,125)             | 90 (67,125)   |
| Mali       | Low            | 40+ threshold    | 36.1%                 | 54.2% (44.4% - 63.5%) | 54.1% (44.3% - 63.5%) | 87 (65,119)             | 87 (65,119)   |
| Mali       | Low            | 65+ threshold    | 52.3%                 | 51.5% (41.3% - 61.9%) | 51.3% (41.3% - 61.4%) | 77 (58,103)             | 77 (58,103)   |

| Country    | Income bracket | Strategy         | Proportion vaccinated | Proportion infected   |                       | Mortalities per 100,000 |               |
|------------|----------------|------------------|-----------------------|-----------------------|-----------------------|-------------------------|---------------|
|            |                |                  |                       | unchanged             | adapted               | unchanged               | adapted       |
| Mali       | Low            | Full sharing     | 55.0%                 | 48.8% (38.6% - 59.0%) | 45.3% (32.1% - 52.8%) | 64 (49,85)              | 59 (43,74)    |
| Malta      | High           | Default          | 100.0%                | 19.9% (17.8% - 21.6%) | 19.9% (17.8% - 21.6%) | 155 (138,175)           | 155 (138,175) |
| Malta      | High           | 2 dose threshold | 94.5%                 | 19.9% (17.8% - 21.6%) | 19.9% (17.8% - 21.6%) | 155 (138,175)           | 155 (138,175) |
| Malta      | High           | 40+ threshold    | 70.5%                 | 21.3% (18.2% - 25.5%) | 20.1% (17.9% - 21.9%) | 155 (138,175)           | 155 (138,175) |
| Malta      | High           | 65+ threshold    | 59.4%                 | 66.2% (56.9% - 71.5%) | 20.2% (18.1% - 22.0%) | 170 (150,191)           | 154 (137,175) |
| Malta      | High           | Full sharing     | 52.8%                 | 70.6% (58.2% - 77.0%) | 8.6% (7.7% - 9.4%)    | 213 (183,242)           | 84 (71,96)    |
| Mauritania | Lower middle   | Default          | 6.6%                  | 57.6% (49.6% - 64.7%) | 57.6% (49.6% - 64.7%) | 140 (105,185)           | 140 (105,185) |
| Mauritania | Lower middle   | 2 dose threshold | 20.0%                 | 57.5% (49.5% - 64.6%) | 57.5% (49.5% - 64.6%) | 139 (104,184)           | 139 (104,184) |
| Mauritania | Lower middle   | 40+ threshold    | 37.4%                 | 56.6% (48.5% - 63.9%) | 56.6% (48.8% - 63.8%) | 126 (96,166)            | 126 (96,166)  |
| Mauritania | Lower middle   | 65+ threshold    | 51.9%                 | 45.7% (36.7% - 54.1%) | 41.5% (33.0% - 51.9%) | 85 (66,110)             | 82 (64,107)   |
| Mauritania | Lower middle   | Full sharing     | 54.5%                 | 36.1% (28.8% - 44.0%) | 35.4% (24.6% - 47.3%) | 71 (55,93)              | 71 (54,100)   |
| Mauritius  | High           | Default          | 61.8%                 | 15.7% (13.8% - 18.0%) | 15.7% (13.8% - 18.0%) | 24 (21,28)              | 24 (21,28)    |
| Mauritius  | High           | 2 dose threshold | 68.8%                 | 15.6% (13.6% - 17.9%) | 15.6% (13.7% - 17.8%) | 24 (20,28)              | 24 (20,28)    |
| Mauritius  | High           | 40+ threshold    | 58.9%                 | 14.2% (12.0% - 16.2%) | 14.1% (11.8% - 16.1%) | 22 (19,25)              | 22 (19,25)    |
| Mauritius  | High           | 65+ threshold    | 55.0%                 | 13.0% (10.6% - 15.5%) | 3.1% (1.9% - 4.8%)    | 21 (18,25)              | 10 (9,11)     |
| Mauritius  | High           | Full sharing     | 53.2%                 | 7.8% (3.7% - 13.2%)   | 1.0% (0.6% - 1.7%)    | 16 (11,21)              | 5 (4,7)       |
| Mexico     | Upper middle   | Default          | 41.2%                 | 72.8% (71.3% - 74.6%) | 72.8% (71.3% - 74.6%) | 368 (310,433)           | 368 (310,433) |
| Mexico     | Upper middle   | 2 dose threshold | 50.1%                 | 72.8% (71.3% - 74.6%) | 72.8% (71.3% - 74.6%) | 368 (310,433)           | 368 (310,433) |
| Mexico     | Upper middle   | 40+ threshold    | 54.7%                 | 72.2% (70.6% - 74.0%) | 72.1% (70.5% - 73.8%) | 365 (308,430)           | 365 (308,430) |
| Mexico     | Upper middle   | 65+ threshold    | 53.8%                 | 71.2% (69.2% - 72.9%) | 65.2% (61.6% - 68.7%) | 354 (299,417)           | 346 (294,406) |
| Mexico     | Upper middle   | Full sharing     | 53.8%                 | 67.6% (62.8% - 71.3%) | 57.4% (50.1% - 60.4%) | 338 (287,396)           | 306 (248,364) |
| Moldova    | Lower middle   | Default          | 16.7%                 | 80.6% (69.1% - 90.7%) | 80.6% (69.1% - 90.7%) | 175 (119,252)           | 175 (119,252) |
| Moldova    | Lower middle   | 2 dose threshold | 28.3%                 | 80.5% (68.9% - 90.7%) | 80.5% (68.8% - 90.7%) | 175 (119,251)           | 175 (119,251) |
| Moldova    | Lower middle   | 40+ threshold    | 45.9%                 | 80.0% (68.1% - 90.5%) | 79.5% (66.5% - 90.5%) | 173 (117,249)           | 173 (117,249) |
| Moldova    | Lower middle   | 65+ threshold    | 51.5%                 | 77.8% (61.6% - 88.8%) | 76.4% (60.2% - 87.7%) | 163 (111,238)           | 162 (110,238) |
| Moldova    | Lower middle   | Full sharing     | 53.1%                 | 75.3% (59.2% - 88.3%) | 62.1% (42.4% - 74.5%) | 149 (109,213)           | 131 (105,167) |
| Montenegro | Upper middle   | Default          | 35.9%                 | 93.3% (89.4% - 96.7%) | 93.3% (89.4% - 96.7%) | 243 (182,339)           | 243 (182,339) |
| Montenegro | Upper middle   | 2 dose threshold | 45.0%                 | 93.0% (89.0% - 96.4%) | 93.0% (89.0% - 96.3%) | 243 (182,339)           | 243 (182,339) |
| Montenegro | Upper middle   | 40+ threshold    | 58.0%                 | 92.4% (88.8% - 95.3%) | 90.2% (86.2% - 94.2%) | 242 (182,337)           | 242 (182,336) |
| Montenegro | Upper middle   | 65+ threshold    | 54.1%                 | 91.9% (87.8% - 95.4%) | 87.9% (79.8% - 93.6%) | 236 (178,331)           | 235 (178,328) |
| Montenegro | Upper middle   | Full sharing     | 53.1%                 | 90.8% (85.5% - 95.3%) | 81.7% (70.2% - 91.2%) | 219 (172,302)           | 188 (152,260) |
| Morocco    | Lower middle   | Default          | 44.9%                 | 68.1% (59.8% - 76.0%) | 68.1% (59.8% - 76.0%) | 199 (160,249)           | 199 (160,249) |
| Morocco    | Lower middle   | 2 dose threshold | 53.0%                 | 68.0% (59.7% - 76.0%) | 68.0% (59.8% - 76.0%) | 198 (160,248)           | 198 (160,248) |
| Morocco    | Lower middle   | 40+ threshold    | 58.3%                 | 67.5% (59.0% - 75.2%) | 67.5% (58.9% - 75.2%) | 197 (159,246)           | 197 (159,246) |
| Morocco    | Lower middle   | 65+ threshold    | 56.5%                 | 68.0% (59.9% - 76.2%) | 63.0% (52.6% - 69.6%) | 200 (160,250)           | 195 (153,239) |

| Country     | Income bracket | Strategy         | Proportion vaccinated | Proportion infected   |                       | Mortalities per 100,000 |               |
|-------------|----------------|------------------|-----------------------|-----------------------|-----------------------|-------------------------|---------------|
|             |                |                  |                       | unchanged             | adapted               | unchanged               | adapted       |
| Morocco     | Lower middle   | Full sharing     | 53.7%                 | 65.3% (54.8% - 73.5%) | 42.4% (40.5% - 45.0%) | 206 (163,254)           | 176 (139,232) |
| Mozambique  | Low            | Default          | 2.3%                  | 76.0% (65.8% - 83.6%) | 76.0% (65.8% - 83.6%) | 106 (82,132)            | 106 (82,132)  |
| Mozambique  | Low            | 2 dose threshold | 16.3%                 | 76.0% (65.7% - 83.6%) | 76.0% (65.7% - 83.6%) | 105 (82,131)            | 105 (82,131)  |
| Mozambique  | Low            | 40+ threshold    | 36.6%                 | 74.8% (64.5% - 82.6%) | 74.8% (64.5% - 82.6%) | 92 (72,114)             | 92 (72,114)   |
| Mozambique  | Low            | 65+ threshold    | 52.2%                 | 56.3% (44.5% - 67.4%) | 39.6% (31.0% - 47.6%) | 61 (50,71)              | 56 (46,66)    |
| Mozambique  | Low            | Full sharing     | 54.7%                 | 41.8% (32.4% - 51.8%) | 17.7% (10.2% - 43.7%) | 51 (42,60)              | 17 (13,24)    |
| Myanmar     | Lower middle   | Default          | 8.3%                  | 55.7% (48.4% - 62.8%) | 55.7% (48.4% - 62.8%) | 142 (113,172)           | 142 (113,172) |
| Myanmar     | Lower middle   | 2 dose threshold | 21.4%                 | 55.6% (48.2% - 62.7%) | 55.6% (48.3% - 62.7%) | 141 (112,171)           | 141 (112,171) |
| Myanmar     | Lower middle   | 40+ threshold    | 39.9%                 | 54.3% (47.2% - 61.4%) | 54.3% (47.2% - 61.4%) | 129 (103,157)           | 129 (103,155) |
| Myanmar     | Lower middle   | 65+ threshold    | 52.4%                 | 41.5% (34.9% - 49.8%) | 15.7% (13.1% - 19.1%) | 75 (62,89)              | 48 (40,57)    |
| Myanmar     | Lower middle   | Full sharing     | 53.9%                 | 25.0% (18.9% - 34.5%) | 13.9% (9.5% - 33.0%)  | 54 (43,65)              | 40 (31,74)    |
| Namibia     | Upper middle   | Default          | 9.3%                  | 86.3% (82.4% - 90.0%) | 86.3% (82.4% - 90.0%) | 107 (80,132)            | 107 (80,132)  |
| Namibia     | Upper middle   | 2 dose threshold | 22.2%                 | 86.3% (82.4% - 90.0%) | 86.3% (82.4% - 90.0%) | 106 (80,131)            | 106 (80,130)  |
| Namibia     | Upper middle   | 40+ threshold    | 39.6%                 | 85.9% (81.9% - 89.8%) | 85.9% (81.8% - 89.7%) | 98 (75,121)             | 98 (75,121)   |
| Namibia     | Upper middle   | 65+ threshold    | 51.6%                 | 80.9% (75.6% - 86.0%) | 68.6% (60.8% - 76.1%) | 66 (53,79)              | 60 (48,70)    |
| Namibia     | Upper middle   | Full sharing     | 54.3%                 | 70.9% (61.1% - 79.2%) | 52.8% (36.5% - 69.9%) | 53 (43,61)              | 41 (33,52)    |
| Nepal       | Lower middle   | Default          | 15.1%                 | 80.3% (75.2% - 84.4%) | 80.3% (75.2% - 84.4%) | 178 (127,236)           | 178 (127,236) |
| Nepal       | Lower middle   | 2 dose threshold | 27.2%                 | 80.3% (75.2% - 84.4%) | 80.3% (75.2% - 84.4%) | 178 (127,235)           | 178 (127,235) |
| Nepal       | Lower middle   | 40+ threshold    | 44.4%                 | 80.1% (75.0% - 84.3%) | 80.1% (74.9% - 84.3%) | 177 (126,234)           | 177 (126,234) |
| Nepal       | Lower middle   | 65+ threshold    | 53.5%                 | 80.0% (74.8% - 84.3%) | 78.3% (73.8% - 83.0%) | 184 (131,246)           | 170 (122,221) |
| Nepal       | Lower middle   | Full sharing     | 54.0%                 | 78.2% (73.0% - 83.0%) | 62.6% (54.7% - 69.0%) | 180 (129,236)           | 148 (92,195)  |
| Netherlands | High           | Default          | 89.4%                 | 39.1% (33.8% - 44.2%) | 39.1% (33.8% - 44.2%) | 307 (260,347)           | 307 (260,347) |
| Netherlands | High           | 2 dose threshold | 91.2%                 | 39.0% (33.8% - 44.1%) | 39.0% (33.8% - 44.1%) | 307 (260,347)           | 307 (260,347) |
| Netherlands | High           | 40+ threshold    | 70.9%                 | 38.9% (33.7% - 44.0%) | 38.5% (33.2% - 43.7%) | 306 (259,346)           | 306 (260,346) |
| Netherlands | High           | 65+ threshold    | 58.2%                 | 45.5% (40.7% - 49.1%) | 38.0% (32.4% - 47.7%) | 311 (261,353)           | 303 (259,344) |
| Netherlands | High           | Full sharing     | 52.9%                 | 47.8% (41.9% - 52.9%) | 22.6% (17.1% - 36.4%) | 326 (275,367)           | 221 (188,280) |
| New Zealand | High           | Default          | 23.3%                 | 0.1% (0.1% - 0.1%)    | 0.1% (0.1% - 0.1%)    | 1 (1,1)                 | 1 (1,1)       |
| New Zealand | High           | 2 dose threshold | 34.4%                 | 0.1% (0.1% - 0.1%)    | 0.1% (0.1% - 0.1%)    | 1 (1,1)                 | 1 (1,1)       |
| New Zealand | High           | 40+ threshold    | 51.4%                 | 0.1% (0.1% - 0.1%)    | 0.1% (0.1% - 0.1%)    | 1 (1,1)                 | 1 (1,1)       |
| New Zealand | High           | 65+ threshold    | 53.1%                 | 0.1% (0.1% - 0.1%)    | 0.1% (0.1% - 0.1%)    | 1 (1,1)                 | 1 (1,1)       |
| New Zealand | High           | Full sharing     | 53.2%                 | 0.1% (0.1% - 0.1%)    | 0.1% (0.1% - 0.1%)    | 1 (1,1)                 | 1 (1,1)       |
| Nicaragua   | Lower middle   | Default          | 6.0%                  | 13.3% (9.5% - 17.2%)  | 13.3% (9.5% - 17.2%)  | 12 (10,14)              | 12 (10,14)    |
| Nicaragua   | Lower middle   | 2 dose threshold | 19.3%                 | 13.3% (9.5% - 17.2%)  | 13.3% (9.5% - 17.2%)  | 12 (10,14)              | 12 (10,14)    |
| Nicaragua   | Lower middle   | 40+ threshold    | 38.5%                 | 12.5% (8.7% - 16.2%)  | 12.5% (8.6% - 16.1%)  | 11 (9,12)               | 11 (9,12)     |
| Nicaragua   | Lower middle   | 65+ threshold    | 51.3%                 | 9.1% (6.2% - 11.5%)   | 7.9% (5.6% - 10.1%)   | 8 (7,9)                 | 8 (7,9)       |

| Country   | Income bracket | Strategy         | Proportion vaccinated | Proportion infected   |                       | Mortalities per 100,000 |               |
|-----------|----------------|------------------|-----------------------|-----------------------|-----------------------|-------------------------|---------------|
|           |                |                  |                       | unchanged             | adapted               | unchanged               | adapted       |
| Nicaragua | Lower middle   | Full sharing     | 53.9%                 | 7.5% (5.4% - 9.5%)    | 5.8% (4.0% - 7.4%)    | 7 (6,8)                 | 6 (5,7)       |
| Niger     | Low            | Default          | 2.4%                  | 47.3% (37.9% - 55.4%) | 47.3% (37.9% - 55.4%) | 39 (31,52)              | 39 (31,52)    |
| Niger     | Low            | 2 dose threshold | 16.5%                 | 45.9% (36.9% - 53.7%) | 45.9% (36.7% - 53.6%) | 38 (30,51)              | 38 (30,51)    |
| Niger     | Low            | 40+ threshold    | 36.4%                 | 39.1% (31.9% - 46.3%) | 38.4% (31.2% - 45.8%) | 34 (28,44)              | 34 (27,44)    |
| Niger     | Low            | 65+ threshold    | 52.3%                 | 34.7% (26.2% - 42.1%) | 34.6% (26.0% - 42.0%) | 32 (25,41)              | 32 (25,41)    |
| Niger     | Low            | Full sharing     | 55.1%                 | 34.0% (25.4% - 41.3%) | 27.7% (18.1% - 42.8%) | 29 (22,36)              | 23 (19,29)    |
| Nigeria   | Lower middle   | Default          | 2.4%                  | 53.4% (46.9% - 59.8%) | 53.4% (46.9% - 59.8%) | 51 (40,62)              | 51 (40,62)    |
| Nigeria   | Lower middle   | 2 dose threshold | 16.4%                 | 52.4% (45.6% - 58.9%) | 52.3% (45.7% - 58.9%) | 51 (39,61)              | 51 (39,61)    |
| Nigeria   | Lower middle   | 40+ threshold    | 36.4%                 | 47.6% (40.8% - 54.6%) | 47.1% (40.3% - 53.8%) | 46 (36,57)              | 46 (36,57)    |
| Nigeria   | Lower middle   | 65+ threshold    | 52.1%                 | 43.3% (38.0% - 48.9%) | 43.1% (38.0% - 48.6%) | 44 (33,55)              | 43 (33,55)    |
| Nigeria   | Lower middle   | Full sharing     | 54.7%                 | 42.1% (37.2% - 47.3%) | 32.4% (27.3% - 38.6%) | 38 (29,48)              | 29 (23,38)    |
| Norway    | High           | Default          | 76.5%                 | 52.7% (37.2% - 65.0%) | 52.7% (37.2% - 65.0%) | 20 (18,22)              | 20 (18,22)    |
| Norway    | High           | 2 dose threshold | 81.5%                 | 50.7% (35.3% - 63.6%) | 50.5% (35.2% - 63.6%) | 20 (18,22)              | 20 (18,22)    |
| Norway    | High           | 40+ threshold    | 66.1%                 | 54.8% (38.1% - 67.8%) | 28.8% (16.1% - 40.8%) | 19 (18,21)              | 19 (17,20)    |
| Norway    | High           | 65+ threshold    | 57.7%                 | 72.0% (64.2% - 77.8%) | 35.1% (21.3% - 47.4%) | 22 (19,26)              | 19 (17,22)    |
| Norway    | High           | Full sharing     | 53.1%                 | 76.7% (68.8% - 81.0%) | 12.1% (5.9% - 19.6%)  | 25 (22,29)              | 12 (11,13)    |
| Oman      | High           | Default          | 32.2%                 | 58.6% (52.5% - 64.8%) | 58.6% (52.5% - 64.8%) | 189 (155,229)           | 189 (155,229) |
| Oman      | High           | 2 dose threshold | 42.8%                 | 58.5% (52.4% - 64.7%) | 58.5% (52.4% - 64.8%) | 188 (154,228)           | 188 (154,228) |
| Oman      | High           | 40+ threshold    | 41.3%                 | 57.9% (51.9% - 64.1%) | 57.9% (52.0% - 64.3%) | 183 (150,221)           | 183 (150,222) |
| Oman      | High           | 65+ threshold    | 51.5%                 | 53.3% (47.2% - 59.6%) | 47.8% (40.4% - 55.3%) | 159 (131,191)           | 144 (121,172) |
| Oman      | High           | Full sharing     | 53.5%                 | 42.8% (36.7% - 49.5%) | 33.6% (24.8% - 46.9%) | 126 (104,150)           | 104 (84,141)  |
| Pakistan  | Lower middle   | Default          | 11.2%                 | 78.1% (75.1% - 80.9%) | 78.1% (75.1% - 80.9%) | 157 (122,200)           | 157 (122,200) |
| Pakistan  | Lower middle   | 2 dose threshold | 24.0%                 | 78.0% (75.0% - 80.8%) | 78.0% (75.0% - 80.8%) | 156 (122,199)           | 156 (122,199) |
| Pakistan  | Lower middle   | 40+ threshold    | 40.5%                 | 77.0% (74.0% - 79.9%) | 76.9% (73.8% - 79.7%) | 152 (119,192)           | 152 (119,192) |
| Pakistan  | Lower middle   | 65+ threshold    | 51.8%                 | 73.3% (69.4% - 77.0%) | 72.3% (67.8% - 76.3%) | 133 (105,168)           | 133 (105,167) |
| Pakistan  | Lower middle   | Full sharing     | 54.3%                 | 70.0% (65.4% - 74.6%) | 57.7% (52.2% - 62.1%) | 113 (89,141)            | 98 (78,122)   |
| Palestine | Lower middle   | Default          | 19.5%                 | 71.4% (66.1% - 76.2%) | 71.4% (66.1% - 76.2%) | 170 (128,215)           | 170 (128,215) |
| Palestine | Lower middle   | 2 dose threshold | 31.3%                 | 71.1% (65.9% - 76.1%) | 71.1% (65.9% - 76.1%) | 169 (127,214)           | 169 (127,214) |
| Palestine | Lower middle   | 40+ threshold    | 44.5%                 | 69.7% (64.0% - 76.0%) | 69.4% (63.6% - 76.0%) | 166 (125,208)           | 166 (125,208) |
| Palestine | Lower middle   | 65+ threshold    | 51.8%                 | 68.1% (61.8% - 75.4%) | 67.7% (60.5% - 75.1%) | 150 (111,190)           | 150 (111,189) |
| Palestine | Lower middle   | Full sharing     | 54.5%                 | 65.9% (59.1% - 73.0%) | 48.9% (38.8% - 56.9%) | 118 (86,150)            | 85 (64,107)   |
| Panama    | High           | Default          | 100.0%                | 53.2% (48.5% - 58.3%) | 53.2% (48.5% - 58.3%) | 186 (157,223)           | 186 (157,223) |
| Panama    | High           | 2 dose threshold | 96.2%                 | 53.1% (48.5% - 58.3%) | 53.1% (48.5% - 58.3%) | 186 (157,222)           | 186 (157,222) |
| Panama    | High           | 40+ threshold    | 59.4%                 | 53.1% (48.7% - 57.9%) | 53.1% (48.6% - 57.8%) | 185 (156,222)           | 185 (156,222) |
| Panama    | High           | 65+ threshold    | 54.9%                 | 53.1% (49.2% - 56.9%) | 50.1% (45.5% - 56.0%) | 182 (153,219)           | 180 (151,215) |

| Country     | Income bracket | Strategy         | Proportion vaccinated | Proportion infected   |                       | Mortalities per 100,000 |               |
|-------------|----------------|------------------|-----------------------|-----------------------|-----------------------|-------------------------|---------------|
|             |                |                  |                       | unchanged             | adapted               | unchanged               | adapted       |
| Panama      | High           | Full sharing     | 53.6%                 | 50.1% (46.1% - 55.5%) | 49.9% (38.6% - 54.0%) | 172 (145,205)           | 171 (146,204) |
| Paraguay    | Upper middle   | Default          | 18.7%                 | 74.2% (69.4% - 77.8%) | 74.2% (69.4% - 77.8%) | 207 (171,256)           | 207 (171,256) |
| Paraguay    | Upper middle   | 2 dose threshold | 30.6%                 | 74.1% (69.4% - 77.7%) | 74.1% (69.4% - 77.7%) | 206 (170,255)           | 206 (170,255) |
| Paraguay    | Upper middle   | 40+ threshold    | 44.4%                 | 73.8% (69.1% - 77.4%) | 73.8% (69.0% - 77.4%) | 201 (166,249)           | 201 (166,249) |
| Paraguay    | Upper middle   | 65+ threshold    | 51.8%                 | 70.3% (65.2% - 74.2%) | 68.5% (62.8% - 73.5%) | 159 (131,198)           | 156 (129,194) |
| Paraguay    | Upper middle   | Full sharing     | 53.8%                 | 62.8% (57.7% - 68.1%) | 40.4% (29.9% - 55.5%) | 120 (101,146)           | 76 (62,100)   |
| Peru        | Upper middle   | Default          | 23.5%                 | 71.6% (66.3% - 76.5%) | 71.6% (66.3% - 76.5%) | 667 (534,834)           | 667 (534,834) |
| Peru        | Upper middle   | 2 dose threshold | 34.7%                 | 71.6% (66.2% - 76.5%) | 71.6% (66.2% - 76.5%) | 666 (533,833)           | 666 (533,833) |
| Peru        | Upper middle   | 40+ threshold    | 48.1%                 | 71.2% (65.5% - 76.3%) | 71.1% (65.3% - 76.3%) | 659 (529,822)           | 659 (528,822) |
| Peru        | Upper middle   | 65+ threshold    | 52.7%                 | 69.1% (63.0% - 74.7%) | 68.6% (61.9% - 74.3%) | 618 (496,772)           | 616 (495,771) |
| Peru        | Upper middle   | Full sharing     | 53.5%                 | 67.1% (60.4% - 72.9%) | 60.5% (55.5% - 64.4%) | 560 (457,691)           | 478 (378,577) |
| Philippines | Lower middle   | Default          | 13.3%                 | 56.8% (48.4% - 65.3%) | 56.8% (48.4% - 65.3%) | 125 (95,154)            | 125 (95,154)  |
| Philippines | Lower middle   | 2 dose threshold | 25.8%                 | 56.7% (48.3% - 65.3%) | 56.7% (48.3% - 65.3%) | 124 (94,153)            | 124 (94,153)  |
| Philippines | Lower middle   | 40+ threshold    | 42.1%                 | 55.3% (46.8% - 63.9%) | 55.0% (46.6% - 63.3%) | 115 (88,140)            | 115 (88,140)  |
| Philippines | Lower middle   | 65+ threshold    | 51.8%                 | 47.5% (37.7% - 57.3%) | 50.6% (43.1% - 58.8%) | 81 (63,95)              | 82 (63,102)   |
| Philippines | Lower middle   | Full sharing     | 54.0%                 | 39.8% (27.6% - 53.4%) | 24.9% (13.4% - 41.5%) | 60 (48,70)              | 43 (31,62)    |
| Poland      | High           | Default          | 64.7%                 | 63.1% (54.3% - 72.1%) | 63.1% (54.3% - 72.1%) | 258 (196,331)           | 258 (196,331) |
| Poland      | High           | 2 dose threshold | 70.1%                 | 63.0% (54.1% - 72.0%) | 63.0% (54.2% - 72.0%) | 258 (196,331)           | 258 (196,331) |
| Poland      | High           | 40+ threshold    | 68.1%                 | 62.9% (53.9% - 72.1%) | 62.7% (53.8% - 70.7%) | 257 (196,331)           | 257 (196,331) |
| Poland      | High           | 65+ threshold    | 57.2%                 | 62.8% (52.8% - 72.0%) | 64.2% (54.2% - 71.8%) | 256 (195,327)           | 257 (196,330) |
| Poland      | High           | Full sharing     | 53.0%                 | 60.8% (49.8% - 71.0%) | 48.6% (36.9% - 60.7%) | 276 (208,359)           | 230 (181,274) |
| Portugal    | High           | Default          | 77.8%                 | 34.0% (29.9% - 37.9%) | 34.0% (29.9% - 37.9%) | 327 (284,384)           | 327 (284,384) |
| Portugal    | High           | 2 dose threshold | 81.9%                 | 34.0% (29.9% - 37.9%) | 34.0% (29.9% - 37.9%) | 327 (284,384)           | 327 (284,384) |
| Portugal    | High           | 40+ threshold    | 71.7%                 | 34.0% (29.9% - 37.8%) | 34.0% (29.9% - 37.8%) | 327 (284,384)           | 327 (284,384) |
| Portugal    | High           | 65+ threshold    | 59.0%                 | 34.1% (30.0% - 37.8%) | 34.0% (29.9% - 37.8%) | 326 (283,383)           | 326 (282,382) |
| Portugal    | High           | Full sharing     | 53.1%                 | 34.5% (30.5% - 38.3%) | 20.1% (14.3% - 38.2%) | 346 (300,405)           | 207 (165,325) |
| Puerto Rico | High           | Default          | 0.0%                  | 31.9% (28.0% - 36.1%) | 31.9% (28.0% - 36.1%) | 243 (205,282)           | 243 (205,282) |
| Puerto Rico | High           | 2 dose threshold | 13.5%                 | 31.8% (27.9% - 35.9%) | 31.8% (27.8% - 35.9%) | 242 (204,281)           | 242 (204,281) |
| Puerto Rico | High           | 40+ threshold    | 33.7%                 | 30.8% (27.0% - 34.8%) | 30.7% (26.8% - 34.8%) | 224 (188,258)           | 224 (189,259) |
| Puerto Rico | High           | 65+ threshold    | 50.5%                 | 24.5% (21.0% - 28.3%) | 22.8% (19.1% - 26.9%) | 169 (144,192)           | 165 (140,187) |
| Puerto Rico | High           | Full sharing     | 53.1%                 | 19.8% (16.9% - 23.0%) | 13.8% (10.4% - 29.3%) | 144 (123,163)           | 105 (85,169)  |
| Qatar       | High           | Default          | 88.5%                 | 66.7% (59.6% - 73.3%) | 66.7% (59.6% - 73.3%) | 28 (21,35)              | 28 (21,35)    |
| Qatar       | High           | 2 dose threshold | 90.7%                 | 66.7% (59.6% - 73.3%) | 66.7% (59.6% - 73.3%) | 28 (21,35)              | 28 (21,35)    |
| Qatar       | High           | 40+ threshold    | 49.2%                 | 68.5% (62.0% - 74.9%) | 68.0% (60.8% - 74.4%) | 28 (21,35)              | 28 (21,35)    |
| Qatar       | High           | 65+ threshold    | 51.8%                 | 71.4% (64.9% - 77.8%) | 70.5% (64.0% - 77.1%) | 30 (23,37)              | 30 (22,37)    |

| Country               | Income bracket | Strategy         | Proportion vaccinated | Proportion infected   |                       | Mortalities per 100,000 |               |
|-----------------------|----------------|------------------|-----------------------|-----------------------|-----------------------|-------------------------|---------------|
|                       |                |                  |                       | unchanged             | adapted               | unchanged               | adapted       |
| Qatar                 | High           | Full sharing     | 53.1%                 | 68.9% (62.0% - 76.2%) | 61.1% (57.8% - 64.6%) | 28 (21,34)              | 24 (18,32)    |
| Republic of Macedonia | Upper middle   | Default          | 52.1%                 | 85.7% (80.4% - 90.1%) | 85.7% (80.4% - 90.1%) | 417 (322,505)           | 417 (322,505) |
| Republic of Macedonia | Upper middle   | 2 dose threshold | 59.4%                 | 85.5% (80.3% - 89.9%) | 85.5% (80.3% - 89.9%) | 416 (321,505)           | 416 (321,504) |
| Republic of Macedonia | Upper middle   | 40+ threshold    | 64.1%                 | 84.7% (78.8% - 89.4%) | 82.4% (77.5% - 86.7%) | 413 (319,501)           | 413 (319,501) |
| Republic of Macedonia | Upper middle   | 65+ threshold    | 51.7%                 | 86.4% (80.6% - 91.0%) | 76.0% (68.8% - 83.9%) | 395 (298,482)           | 390 (297,473) |
| Republic of Macedonia | Upper middle   | Full sharing     | 53.0%                 | 84.5% (75.8% - 91.5%) | 66.7% (58.7% - 73.6%) | 356 (270,432)           | 298 (223,367) |
| Romania               | High           | Default          | 35.5%                 | 73.4% (67.0% - 78.5%) | 73.4% (67.0% - 78.5%) | 313 (252,376)           | 313 (252,376) |
| Romania               | High           | 2 dose threshold | 44.7%                 | 73.3% (66.9% - 78.4%) | 73.3% (66.8% - 78.4%) | 313 (252,375)           | 313 (252,375) |
| Romania               | High           | 40+ threshold    | 58.3%                 | 71.3% (64.7% - 76.9%) | 70.3% (63.5% - 75.6%) | 309 (249,370)           | 308 (248,369) |
| Romania               | High           | 65+ threshold    | 57.4%                 | 69.6% (61.7% - 74.7%) | 51.7% (43.7% - 58.8%) | 304 (245,366)           | 290 (235,348) |
| Romania               | High           | Full sharing     | 53.0%                 | 64.4% (52.1% - 72.6%) | 43.8% (30.8% - 55.3%) | 328 (262,398)           | 278 (230,340) |
| Russian Federation    | Upper middle   | Default          | 26.2%                 | 77.4% (68.0% - 85.1%) | 77.4% (68.0% - 85.1%) | 168 (138,198)           | 168 (138,198) |
| Russian Federation    | Upper middle   | 2 dose threshold | 37.0%                 | 77.4% (67.9% - 85.0%) | 77.4% (67.9% - 85.0%) | 168 (137,198)           | 168 (137,198) |
| Russian Federation    | Upper middle   | 40+ threshold    | 52.7%                 | 77.2% (67.5% - 85.1%) | 76.8% (67.4% - 84.5%) | 166 (137,196)           | 166 (137,196) |
| Russian Federation    | Upper middle   | 65+ threshold    | 54.9%                 | 75.8% (64.3% - 84.9%) | 72.3% (56.9% - 84.4%) | 159 (133,185)           | 155 (133,175) |
| Russian Federation    | Upper middle   | Full sharing     | 54.1%                 | 77.0% (62.2% - 86.7%) | 58.3% (39.7% - 69.9%) | 158 (134,182)           | 144 (122,165) |
| Rwanda                | Low            | Default          | 5.8%                  | 61.1% (50.8% - 69.9%) | 61.1% (50.8% - 69.9%) | 47 (35,63)              | 47 (35,63)    |
| Rwanda                | Low            | 2 dose threshold | 19.3%                 | 61.0% (50.5% - 69.8%) | 61.0% (50.5% - 69.8%) | 47 (35,63)              | 47 (35,63)    |
| Rwanda                | Low            | 40+ threshold    | 38.6%                 | 59.8% (48.8% - 69.1%) | 59.9% (49.1% - 69.2%) | 45 (34,60)              | 45 (34,60)    |
| Rwanda                | Low            | 65+ threshold    | 52.9%                 | 52.3% (40.8% - 63.1%) | 23.8% (17.4% - 30.4%) | 35 (27,44)              | 25 (20,32)    |
| Rwanda                | Low            | Full sharing     | 54.5%                 | 33.8% (23.9% - 47.3%) | 10.3% (6.8% - 14.0%)  | 26 (21,32)              | 10 (8,12)     |
| Sao Tome and Principe | Lower middle   | Default          | 20.1%                 | 69.4% (61.4% - 79.6%) | 69.4% (61.4% - 79.6%) | 76 (54,102)             | 76 (54,102)   |
| Sao Tome and Principe | Lower middle   | 2 dose threshold | 32.2%                 | 67.7% (59.6% - 78.7%) | 67.6% (59.4% - 78.6%) | 76 (54,102)             | 76 (54,102)   |
| Sao Tome and Principe | Lower middle   | 40+ threshold    | 42.9%                 | 59.0% (49.2% - 71.9%) | 55.7% (45.1% - 70.2%) | 73 (52,96)              | 72 (51,96)    |
| Sao Tome and Principe | Lower middle   | 65+ threshold    | 53.0%                 | 52.0% (42.0% - 63.8%) | 51.0% (41.1% - 61.5%) | 70 (49,93)              | 70 (49,93)    |
| Sao Tome and Principe | Lower middle   | Full sharing     | 54.8%                 | 50.7% (40.8% - 61.1%) | 33.8% (19.5% - 48.3%) | 61 (43,81)              | 37 (29,58)    |
| Saudi Arabia          | High           | Default          | 76.1%                 | 38.4% (31.9% - 44.1%) | 38.4% (31.9% - 44.1%) | 137 (114,165)           | 137 (114,165) |
| Saudi Arabia          | High           | 2 dose threshold | 86.4%                 | 38.3% (31.8% - 43.9%) | 38.4% (31.9% - 44.0%) | 136 (114,164)           | 136 (114,164) |
| Saudi Arabia          | High           | 40+ threshold    | 68.0%                 | 37.9% (31.5% - 43.4%) | 37.9% (31.6% - 43.4%) | 128 (106,155)           | 128 (106,155) |
| Saudi Arabia          | High           | 65+ threshold    | 51.0%                 | 33.4% (27.6% - 39.0%) | 36.6% (30.1% - 43.5%) | 101 (84,120)            | 103 (87,125)  |
| Saudi Arabia          | High           | Full sharing     | 53.7%                 | 29.1% (23.7% - 33.9%) | 31.9% (20.3% - 43.0%) | 86 (72,104)             | 93 (70,130)   |
| Senegal               | Lower middle   | Default          | 6.6%                  | 75.3% (68.1% - 80.9%) | 75.3% (68.1% - 80.9%) | 84 (65,105)             | 84 (65,105)   |
| Senegal               | Lower middle   | 2 dose threshold | 20.0%                 | 75.2% (68.0% - 80.9%) | 75.2% (67.9% - 80.9%) | 84 (65,105)             | 84 (65,105)   |
| Senegal               | Lower middle   | 40+ threshold    | 39.3%                 | 73.4% (65.9% - 79.1%) | 73.3% (65.8% - 79.1%) | 81 (63,100)             | 81 (63,100)   |
| Senegal               | Lower middle   | 65+ threshold    | 52.8%                 | 59.7% (51.8% - 67.6%) | 51.1% (44.1% - 57.3%) | 73 (56,90)              | 71 (55,88)    |

| Country      | Income bracket | Strategy         | Proportion vaccinated | Proportion infected   |                       | Mortalities per 100,000 |               |
|--------------|----------------|------------------|-----------------------|-----------------------|-----------------------|-------------------------|---------------|
|              |                |                  |                       | unchanged             | adapted               | unchanged               | adapted       |
| Senegal      | Lower middle   | Full sharing     | 54.7%                 | 52.2% (44.1% - 60.5%) | 35.6% (24.0% - 51.3%) | 61 (48,75)              | 43 (33,57)    |
| Serbia       | Upper middle   | Default          | 44.8%                 | 72.9% (64.6% - 79.9%) | 72.9% (64.6% - 79.9%) | 175 (141,219)           | 175 (141,219) |
| Serbia       | Upper middle   | 2 dose threshold | 52.8%                 | 72.8% (64.4% - 79.8%) | 72.8% (64.4% - 79.8%) | 175 (141,219)           | 175 (141,219) |
| Serbia       | Upper middle   | 40+ threshold    | 64.0%                 | 71.1% (62.2% - 78.5%) | 70.4% (61.6% - 77.9%) | 174 (140,217)           | 173 (140,217) |
| Serbia       | Upper middle   | 65+ threshold    | 57.8%                 | 74.5% (66.8% - 80.9%) | 55.8% (45.3% - 65.0%) | 177 (142,222)           | 166 (133,213) |
| Serbia       | Upper middle   | Full sharing     | 53.0%                 | 72.7% (62.3% - 80.6%) | 43.8% (31.0% - 55.8%) | 205 (163,262)           | 163 (138,202) |
| Sierra Leone | Low            | Default          | 2.4%                  | 40.7% (34.4% - 45.7%) | 40.7% (34.4% - 45.7%) | 58 (49,70)              | 58 (49,70)    |
| Sierra Leone | Low            | 2 dose threshold | 16.4%                 | 40.6% (34.3% - 45.7%) | 40.6% (34.3% - 45.7%) | 58 (48,69)              | 58 (48,69)    |
| Sierra Leone | Low            | 40+ threshold    | 36.6%                 | 39.5% (33.4% - 44.4%) | 39.5% (33.2% - 44.6%) | 53 (44,63)              | 53 (44,63)    |
| Sierra Leone | Low            | 65+ threshold    | 52.1%                 | 31.1% (25.6% - 35.6%) | 28.5% (23.0% - 33.7%) | 41 (35,49)              | 41 (34,48)    |
| Sierra Leone | Low            | Full sharing     | 54.6%                 | 27.3% (22.3% - 31.2%) | 22.3% (16.7% - 31.8%) | 36 (30,43)              | 30 (25,36)    |
| Singapore    | High           | Default          | 83.8%                 | 14.7% (12.0% - 17.6%) | 14.7% (12.0% - 17.6%) | 2 (2,2)                 | 2 (2,2)       |
| Singapore    | High           | 2 dose threshold | 87.5%                 | 14.6% (12.0% - 17.3%) | 14.6% (12.0% - 17.4%) | 2 (2,2)                 | 2 (2,2)       |
| Singapore    | High           | 40+ threshold    | 67.9%                 | 14.4% (10.6% - 18.6%) | 5.3% (3.5% - 8.6%)    | 2 (2,2)                 | 1 (1,2)       |
| Singapore    | High           | 65+ threshold    | 54.6%                 | 78.9% (71.3% - 84.3%) | 4.2% (2.7% - 6.0%)    | 6 (5,9)                 | 1 (1,1)       |
| Singapore    | High           | Full sharing     | 53.0%                 | 67.6% (40.7% - 80.6%) | 2.9% (1.7% - 4.3%)    | 5 (3,8)                 | 1 (1,1)       |
| Slovakia     | High           | Default          | 54.6%                 | 52.9% (47.0% - 59.3%) | 52.9% (47.0% - 59.3%) | 112 (95,135)            | 112 (95,135)  |
| Slovakia     | High           | 2 dose threshold | 61.4%                 | 51.7% (45.8% - 58.3%) | 51.7% (45.8% - 58.2%) | 112 (95,135)            | 112 (95,135)  |
| Slovakia     | High           | 40+ threshold    | 66.2%                 | 49.0% (43.1% - 55.0%) | 43.9% (39.1% - 49.1%) | 112 (95,134)            | 111 (94,134)  |
| Slovakia     | High           | 65+ threshold    | 56.5%                 | 58.9% (54.4% - 64.9%) | 43.2% (38.1% - 49.2%) | 113 (95,136)            | 111 (94,133)  |
| Slovakia     | High           | Full sharing     | 53.0%                 | 52.5% (45.5% - 60.2%) | 25.7% (17.9% - 35.1%) | 125 (105,150)           | 70 (62,83)    |
| Slovenia     | High           | Default          | 58.9%                 | 64.9% (54.5% - 73.9%) | 64.9% (54.5% - 73.9%) | 337 (287,401)           | 337 (287,401) |
| Slovenia     | High           | 2 dose threshold | 64.9%                 | 64.5% (53.9% - 73.6%) | 64.4% (53.8% - 73.5%) | 337 (287,401)           | 337 (287,401) |
| Slovenia     | High           | 40+ threshold    | 69.1%                 | 62.8% (51.3% - 72.7%) | 60.8% (49.0% - 70.6%) | 335 (286,398)           | 334 (284,396) |
| Slovenia     | High           | 65+ threshold    | 58.1%                 | 68.8% (59.7% - 76.9%) | 51.2% (40.8% - 61.7%) | 341 (289,407)           | 326 (277,387) |
| Slovenia     | High           | Full sharing     | 53.5%                 | 66.6% (55.0% - 76.4%) | 38.6% (24.1% - 56.6%) | 355 (299,425)           | 278 (234,346) |
| South Africa | Upper middle   | Default          | 16.4%                 | 84.2% (75.7% - 95.7%) | 84.2% (75.7% - 95.7%) | 165 (130,243)           | 165 (130,243) |
| South Africa | Upper middle   | 2 dose threshold | 28.6%                 | 83.9% (75.7% - 94.9%) | 83.9% (75.7% - 94.9%) | 165 (130,242)           | 165 (130,242) |
| South Africa | Upper middle   | 40+ threshold    | 43.9%                 | 82.7% (74.7% - 94.3%) | 81.9% (73.4% - 94.3%) | 163 (129,231)           | 163 (129,232) |
| South Africa | Upper middle   | 65+ threshold    | 52.2%                 | 79.5% (72.5% - 92.7%) | 74.8% (60.5% - 81.2%) | 156 (128,198)           | 153 (127,181) |
| South Africa | Upper middle   | Full sharing     | 54.0%                 | 76.7% (64.5% - 90.1%) | 73.6% (54.6% - 80.5%) | 153 (127,188)           | 151 (127,178) |
| South Korea  | High           | Default          | 41.9%                 | 8.0% (6.8% - 9.6%)    | 8.0% (6.8% - 9.6%)    | 12 (11,13)              | 12 (11,13)    |
| South Korea  | High           | 2 dose threshold | 50.2%                 | 7.4% (6.1% - 9.0%)    | 7.4% (6.1% - 9.0%)    | 12 (11,13)              | 12 (11,13)    |
| South Korea  | High           | 40+ threshold    | 64.0%                 | 5.5% (4.2% - 7.0%)    | 5.0% (3.5% - 6.5%)    | 11 (10,12)              | 11 (10,12)    |
| South Korea  | High           | 65+ threshold    | 52.4%                 | 3.7% (2.7% - 4.8%)    | 5.5% (2.5% - 10.1%)   | 7 (7,8)                 | 8 (6,12)      |

| Country     | Income bracket | Strategy         | Proportion vaccinated | Proportion infected   |                       | Mortalities per 100,000 |               |
|-------------|----------------|------------------|-----------------------|-----------------------|-----------------------|-------------------------|---------------|
|             |                |                  |                       | unchanged             | adapted               | unchanged               | adapted       |
| South Korea | High           | Full sharing     | 52.9%                 | 2.2% (1.7% - 3.0%)    | 1.0% (0.7% - 1.2%)    | 6 (5,6)                 | 3 (3,3)       |
| South Sudan | Low            | Default          | 0.8%                  | 54.7% (41.0% - 65.6%) | 54.7% (41.0% - 65.6%) | 54 (41,70)              | 54 (41,70)    |
| South Sudan | Low            | 2 dose threshold | 15.0%                 | 54.7% (41.0% - 65.6%) | 54.7% (41.0% - 65.6%) | 54 (41,70)              | 54 (41,70)    |
| South Sudan | Low            | 40+ threshold    | 35.6%                 | 54.7% (41.0% - 65.6%) | 54.7% (41.0% - 65.6%) | 54 (40,69)              | 54 (40,69)    |
| South Sudan | Low            | 65+ threshold    | 52.0%                 | 54.7% (41.0% - 65.5%) | 54.6% (40.9% - 65.5%) | 53 (39,68)              | 53 (39,68)    |
| South Sudan | Low            | Full sharing     | 54.6%                 | 54.1% (40.6% - 64.9%) | 35.8% (22.3% - 50.9%) | 46 (34,59)              | 28 (22,36)    |
| Spain       | High           | Default          | 79.7%                 | 45.3% (40.1% - 50.4%) | 45.3% (40.1% - 50.4%) | 435 (398,476)           | 435 (398,476) |
| Spain       | High           | 2 dose threshold | 83.4%                 | 45.3% (40.1% - 50.4%) | 45.3% (40.1% - 50.3%) | 435 (397,476)           | 435 (397,476) |
| Spain       | High           | 40+ threshold    | 71.0%                 | 44.9% (39.8% - 49.6%) | 44.1% (38.4% - 48.8%) | 433 (395,474)           | 433 (395,474) |
| Spain       | High           | 65+ threshold    | 58.0%                 | 51.5% (47.2% - 55.8%) | 36.9% (33.0% - 40.6%) | 443 (405,488)           | 421 (383,462) |
| Spain       | High           | Full sharing     | 52.8%                 | 49.9% (41.6% - 55.5%) | 22.8% (19.9% - 26.3%) | 496 (453,547)           | 297 (263,339) |
| Sri Lanka   | Lower middle   | Default          | 21.4%                 | 32.0% (29.3% - 34.4%) | 32.0% (29.3% - 34.4%) | 12 (8,17)               | 12 (8,17)     |
| Sri Lanka   | Lower middle   | 2 dose threshold | 32.9%                 | 31.9% (29.2% - 34.1%) | 31.9% (29.2% - 34.1%) | 12 (8,17)               | 12 (8,17)     |
| Sri Lanka   | Lower middle   | 40+ threshold    | 48.1%                 | 30.4% (28.1% - 32.3%) | 30.1% (28.1% - 31.9%) | 11 (8,16)               | 11 (8,15)     |
| Sri Lanka   | Lower middle   | 65+ threshold    | 54.3%                 | 22.0% (18.9% - 24.9%) | 28.3% (14.5% - 39.4%) | 7 (5,9)                 | 8 (5,12)      |
| Sri Lanka   | Lower middle   | Full sharing     | 53.5%                 | 17.1% (12.8% - 21.6%) | 3.3% (2.0% - 5.8%)    | 6 (5,8)                 | 2 (1,2)       |
| Sudan       | Low            | Default          | 2.5%                  | 49.2% (40.0% - 59.3%) | 49.2% (40.0% - 59.3%) | 83 (67,104)             | 83 (67,104)   |
| Sudan       | Low            | 2 dose threshold | 16.4%                 | 49.2% (40.0% - 59.2%) | 49.2% (40.0% - 59.3%) | 83 (66,104)             | 83 (66,104)   |
| Sudan       | Low            | 40+ threshold    | 36.8%                 | 48.8% (39.5% - 58.8%) | 48.8% (39.4% - 58.9%) | 80 (64,100)             | 80 (65,100)   |
| Sudan       | Low            | 65+ threshold    | 51.9%                 | 45.1% (36.2% - 54.6%) | 45.2% (35.7% - 58.7%) | 66 (51,84)              | 66 (52,85)    |
| Sudan       | Low            | Full sharing     | 54.5%                 | 40.0% (32.7% - 47.0%) | 38.2% (28.5% - 42.4%) | 56 (45,71)              | 54 (42,69)    |
| Suriname    | Upper middle   | Default          | 45.8%                 | 54.4% (46.3% - 60.9%) | 54.4% (46.3% - 60.9%) | 162 (129,206)           | 162 (129,206) |
| Suriname    | Upper middle   | 2 dose threshold | 54.2%                 | 54.1% (46.1% - 60.5%) | 54.1% (46.0% - 60.4%) | 161 (129,205)           | 161 (129,205) |
| Suriname    | Upper middle   | 40+ threshold    | 53.4%                 | 53.5% (45.4% - 60.2%) | 52.3% (44.6% - 58.3%) | 157 (125,199)           | 157 (126,199) |
| Suriname    | Upper middle   | 65+ threshold    | 53.2%                 | 54.4% (43.6% - 64.0%) | 46.1% (38.3% - 51.6%) | 132 (107,165)           | 130 (103,164) |
| Suriname    | Upper middle   | Full sharing     | 53.8%                 | 66.2% (52.0% - 75.6%) | 17.8% (11.2% - 32.3%) | 115 (96,135)            | 55 (42,75)    |
| Sweden      | High           | Default          | 76.5%                 | 34.3% (29.6% - 39.4%) | 34.3% (29.6% - 39.4%) | 249 (213,288)           | 249 (213,288) |
| Sweden      | High           | 2 dose threshold | 80.8%                 | 34.3% (29.6% - 39.4%) | 34.3% (29.6% - 39.4%) | 249 (213,288)           | 249 (213,288) |
| Sweden      | High           | 40+ threshold    | 70.1%                 | 33.9% (29.3% - 39.0%) | 33.9% (29.3% - 39.0%) | 248 (212,287)           | 248 (212,287) |
| Sweden      | High           | 65+ threshold    | 59.0%                 | 35.6% (31.2% - 40.5%) | 35.0% (31.0% - 40.3%) | 249 (213,289)           | 247 (211,288) |
| Sweden      | High           | Full sharing     | 53.1%                 | 34.3% (29.3% - 39.2%) | 21.6% (16.6% - 38.4%) | 275 (233,321)           | 193 (164,257) |
| Switzerland | High           | Default          | 73.2%                 | 32.2% (28.8% - 36.0%) | 32.2% (28.8% - 36.0%) | 246 (216,277)           | 246 (216,277) |
| Switzerland | High           | 2 dose threshold | 77.3%                 | 31.9% (28.4% - 35.6%) | 31.9% (28.4% - 35.6%) | 246 (216,277)           | 246 (216,277) |
| Switzerland | High           | 40+ threshold    | 68.8%                 | 32.5% (29.1% - 36.4%) | 30.4% (26.4% - 34.3%) | 245 (215,276)           | 245 (215,275) |
| Switzerland | High           | 65+ threshold    | 57.8%                 | 42.9% (36.8% - 49.5%) | 28.6% (24.4% - 34.0%) | 250 (220,281)           | 242 (213,270) |



| Country             | Income bracket | Strategy         | Proportion vaccinated | Proportion infected   |                       | Mortalities per 100,000 |               |
|---------------------|----------------|------------------|-----------------------|-----------------------|-----------------------|-------------------------|---------------|
|                     |                |                  |                       | unchanged             | adapted               | unchanged               | adapted       |
| Switzerland         | High           | Full sharing     | 52.8%                 | 42.1% (32.6% - 49.6%) | 19.0% (16.3% - 23.7%) | 277 (243,307)           | 197 (164,229) |
| Syria               | Low            | Default          | 1.1%                  | 23.5% (19.4% - 28.2%) | 23.5% (19.4% - 28.2%) | 113 (94,139)            | 113 (94,139)  |
| Syria               | Low            | 2 dose threshold | 15.0%                 | 23.3% (19.2% - 28.0%) | 23.3% (19.2% - 28.0%) | 111 (91,136)            | 111 (91,136)  |
| Syria               | Low            | 40+ threshold    | 35.6%                 | 21.3% (17.2% - 25.9%) | 20.9% (16.7% - 25.5%) | 87 (73,103)             | 86 (72,102)   |
| Syria               | Low            | 65+ threshold    | 51.4%                 | 14.6% (11.6% - 18.4%) | 17.6% (12.9% - 24.3%) | 59 (51,70)              | 62 (52,73)    |
| Syria               | Low            | Full sharing     | 54.0%                 | 12.3% (9.7% - 15.4%)  | 9.3% (5.5% - 19.9%)   | 48 (41,56)              | 34 (26,55)    |
| Tajikistan          | Low            | Default          | 5.7%                  | 81.8% (79.3% - 83.5%) | 81.8% (79.3% - 83.5%) | 20 (11,32)              | 20 (11,32)    |
| Tajikistan          | Low            | 2 dose threshold | 19.3%                 | 81.8% (79.2% - 83.4%) | 81.8% (79.2% - 83.4%) | 20 (10,31)              | 20 (10,31)    |
| Tajikistan          | Low            | 40+ threshold    | 37.2%                 | 81.4% (78.9% - 83.1%) | 81.4% (78.7% - 83.1%) | 19 (10,30)              | 19 (10,30)    |
| Tajikistan          | Low            | 65+ threshold    | 51.5%                 | 77.8% (74.2% - 80.9%) | 76.4% (72.4% - 80.5%) | 14 (9,23)               | 14 (9,23)     |
| Tajikistan          | Low            | Full sharing     | 54.2%                 | 72.4% (65.7% - 78.3%) | 50.9% (33.6% - 61.9%) | 11 (7,16)               | 7 (5,10)      |
| Thailand            | Upper middle   | Default          | 16.1%                 | 29.0% (25.6% - 33.5%) | 29.0% (25.6% - 33.5%) | 25 (18,34)              | 25 (18,34)    |
| Thailand            | Upper middle   | 2 dose threshold | 28.2%                 | 28.9% (25.4% - 33.3%) | 28.9% (25.5% - 33.3%) | 25 (18,33)              | 25 (18,33)    |
| Thailand            | Upper middle   | 40+ threshold    | 46.9%                 | 27.6% (24.0% - 32.0%) | 27.3% (23.8% - 31.7%) | 22 (16,29)              | 22 (16,29)    |
| Thailand            | Upper middle   | 65+ threshold    | 51.3%                 | 19.0% (15.3% - 23.0%) | 15.1% (9.7% - 22.5%)  | 9 (7,12)                | 8 (5,10)      |
| Thailand            | Upper middle   | Full sharing     | 53.2%                 | 8.9% (5.6% - 12.3%)   | 0.4% (0.3% - 0.7%)    | 4 (3,6)                 | 0 (0,1)       |
| Togo                | Low            | Default          | 7.0%                  | 48.9% (40.8% - 55.3%) | 48.9% (40.8% - 55.3%) | 68 (56,84)              | 68 (56,84)    |
| Togo                | Low            | 2 dose threshold | 20.4%                 | 48.8% (40.7% - 55.2%) | 48.8% (40.7% - 55.2%) | 68 (55,84)              | 68 (55,84)    |
| Togo                | Low            | 40+ threshold    | 39.8%                 | 47.0% (38.8% - 53.2%) | 47.0% (38.9% - 53.5%) | 63 (52,77)              | 63 (52,77)    |
| Togo                | Low            | 65+ threshold    | 52.0%                 | 34.5% (28.4% - 41.0%) | 27.8% (22.8% - 31.8%) | 49 (42,60)              | 47 (39,57)    |
| Togo                | Low            | Full sharing     | 54.6%                 | 27.2% (21.8% - 31.8%) | 14.3% (9.6% - 29.5%)  | 40 (34,49)              | 21 (17,30)    |
| Trinidad and Tobago | High           | Default          | 23.7%                 | 57.1% (45.3% - 66.5%) | 57.1% (45.3% - 66.5%) | 169 (138,214)           | 169 (138,214) |
| Trinidad and Tobago | High           | 2 dose threshold | 34.8%                 | 56.3% (44.6% - 66.1%) | 56.2% (44.6% - 65.9%) | 166 (137,212)           | 166 (137,212) |
| Trinidad and Tobago | High           | 40+ threshold    | 50.6%                 | 50.7% (38.9% - 60.3%) | 47.7% (36.5% - 57.3%) | 152 (125,190)           | 150 (125,190) |
| Trinidad and Tobago | High           | 65+ threshold    | 51.3%                 | 42.1% (28.7% - 55.4%) | 28.4% (21.8% - 33.9%) | 114 (95,141)            | 105 (86,135)  |
| Trinidad and Tobago | High           | Full sharing     | 53.4%                 | 36.9% (19.5% - 56.6%) | 8.7% (4.5% - 15.3%)   | 79 (67,95)              | 27 (19,43)    |
| Tunisia             | Lower middle   | Default          | 18.4%                 | 79.1% (72.7% - 83.4%) | 79.1% (72.7% - 83.4%) | 253 (196,340)           | 253 (196,340) |
| Tunisia             | Lower middle   | 2 dose threshold | 30.3%                 | 79.1% (72.7% - 83.4%) | 79.1% (72.7% - 83.4%) | 252 (195,338)           | 252 (195,339) |
| Tunisia             | Lower middle   | 40+ threshold    | 46.6%                 | 78.7% (72.4% - 83.1%) | 78.7% (72.5% - 83.2%) | 245 (191,329)           | 245 (191,329) |
| Tunisia             | Lower middle   | 65+ threshold    | 51.7%                 | 74.7% (67.5% - 79.9%) | 73.0% (64.2% - 78.7%) | 200 (160,263)           | 197 (158,259) |
| Tunisia             | Lower middle   | Full sharing     | 53.4%                 | 68.0% (56.7% - 76.5%) | 50.7% (35.3% - 64.7%) | 166 (134,215)           | 130 (107,159) |
| Turkey              | Upper middle   | Default          | 67.6%                 | 60.0% (53.0% - 66.4%) | 60.0% (53.0% - 66.4%) | 89 (64,127)             | 89 (64,127)   |
| Turkey              | Upper middle   | 2 dose threshold | 73.6%                 | 59.9% (52.9% - 66.4%) | 59.9% (52.9% - 66.4%) | 89 (64,127)             | 89 (64,127)   |
| Turkey              | Upper middle   | 40+ threshold    | 56.5%                 | 59.5% (52.3% - 66.2%) | 59.1% (51.7% - 66.2%) | 88 (64,126)             | 88 (64,126)   |
| Turkey              | Upper middle   | 65+ threshold    | 55.0%                 | 60.8% (54.3% - 66.9%) | 60.1% (48.6% - 71.3%) | 92 (67,130)             | 92 (66,126)   |

| Country                  | Income bracket | Strategy         | Proportion vaccinated | Proportion infected   |                       | Mortalities per 100,000 |               |
|--------------------------|----------------|------------------|-----------------------|-----------------------|-----------------------|-------------------------|---------------|
|                          |                |                  |                       | unchanged             | adapted               | unchanged               | adapted       |
| Turkey                   | Upper middle   | Full sharing     | 53.5%                 | 58.7% (50.0% - 66.4%) | 46.1% (34.1% - 51.0%) | 100 (74,134)            | 83 (59,115)   |
| Uganda                   | Low            | Default          | 3.3%                  | 70.5% (62.2% - 78.6%) | 70.5% (62.2% - 78.6%) | 72 (56,87)              | 72 (56,87)    |
| Uganda                   | Low            | 2 dose threshold | 17.3%                 | 70.4% (62.1% - 78.6%) | 70.4% (62.1% - 78.6%) | 71 (56,86)              | 71 (56,86)    |
| Uganda                   | Low            | 40+ threshold    | 37.4%                 | 69.8% (61.4% - 78.2%) | 69.8% (61.6% - 78.2%) | 67 (53,81)              | 67 (53,81)    |
| Uganda                   | Low            | 65+ threshold    | 52.3%                 | 61.7% (52.5% - 71.6%) | 33.5% (23.8% - 47.6%) | 39 (32,48)              | 26 (22,30)    |
| Uganda                   | Low            | Full sharing     | 55.1%                 | 41.1% (32.3% - 51.9%) | 25.0% (16.4% - 46.9%) | 25 (20,30)              | 19 (14,29)    |
| Ukraine                  | Lower middle   | Default          | 6.8%                  | 84.5% (75.9% - 91.3%) | 84.5% (75.9% - 91.3%) | 174 (118,241)           | 174 (118,241) |
| Ukraine                  | Lower middle   | 2 dose threshold | 19.6%                 | 84.3% (75.5% - 91.2%) | 84.2% (75.4% - 91.1%) | 173 (118,238)           | 173 (117,238) |
| Ukraine                  | Lower middle   | 40+ threshold    | 39.2%                 | 83.7% (74.2% - 91.0%) | 82.0% (71.4% - 89.7%) | 163 (114,222)           | 162 (114,221) |
| Ukraine                  | Lower middle   | 65+ threshold    | 51.4%                 | 79.7% (68.2% - 88.1%) | 66.1% (55.6% - 75.9%) | 150 (109,199)           | 146 (108,194) |
| Ukraine                  | Lower middle   | Full sharing     | 53.1%                 | 76.5% (63.1% - 85.4%) | 55.3% (35.8% - 64.9%) | 134 (99,176)            | 115 (85,142)  |
| United Arab Emirates     | High           | Default          | 100.0%                | 24.1% (20.5% - 27.9%) | 24.1% (20.5% - 27.9%) | 52 (42,62)              | 52 (42,62)    |
| United Arab Emirates     | High           | 2 dose threshold | 94.5%                 | 24.6% (20.8% - 28.9%) | 24.6% (20.8% - 28.5%) | 52 (42,62)              | 52 (42,63)    |
| United Arab Emirates     | High           | 40+ threshold    | 48.1%                 | 73.4% (72.2% - 75.1%) | 41.2% (33.2% - 48.1%) | 129 (94,176)            | 74 (56,100)   |
| United Arab Emirates     | High           | 65+ threshold    | 53.5%                 | 71.5% (70.0% - 73.2%) | 60.5% (47.7% - 67.1%) | 151 (108,209)           | 125 (91,182)  |
| United Arab Emirates     | High           | Full sharing     | 52.9%                 | 64.5% (58.1% - 68.6%) | 36.6% (29.7% - 48.9%) | 184 (133,253)           | 85 (67,120)   |
| United Kingdom           | High           | Default          | 98.2%                 | 25.0% (22.8% - 27.7%) | 25.0% (22.8% - 27.7%) | 202 (176,232)           | 202 (176,232) |
| United Kingdom           | High           | 2 dose threshold | 92.8%                 | 25.5% (22.9% - 29.9%) | 24.3% (22.7% - 25.8%) | 202 (176,232)           | 202 (176,232) |
| United Kingdom           | High           | 40+ threshold    | 70.1%                 | 78.4% (69.9% - 82.8%) | 24.3% (22.7% - 25.7%) | 219 (201,242)           | 202 (176,232) |
| United Kingdom           | High           | 65+ threshold    | 59.3%                 | 70.8% (68.2% - 72.6%) | 27.7% (24.5% - 32.1%) | 278 (245,323)           | 213 (187,248) |
| United Kingdom           | High           | Full sharing     | 52.9%                 | 76.8% (74.3% - 79.8%) | 19.0% (17.0% - 23.6%) | 426 (374,504)           | 223 (192,258) |
| United States of America | High           | Default          | 84.5%                 | 49.5% (47.3% - 52.0%) | 49.5% (47.3% - 52.0%) | 192 (178,203)           | 192 (178,203) |
| United States of America | High           | 2 dose threshold | 87.1%                 | 48.9% (46.8% - 51.3%) | 48.8% (46.7% - 51.2%) | 192 (178,203)           | 192 (178,203) |
| United States of America | High           | 40+ threshold    | 68.4%                 | 73.0% (70.4% - 75.4%) | 34.4% (33.5% - 35.3%) | 225 (208,240)           | 184 (171,196) |
| United States of America | High           | 65+ threshold    | 58.1%                 | 81.5% (80.7% - 82.5%) | 37.2% (34.9% - 40.8%) | 245 (226,263)           | 188 (173,200) |
| United States of America | High           | Full sharing     | 55.4%                 | 82.5% (81.7% - 83.5%) | 24.7% (21.6% - 37.1%) | 270 (250,289)           | 162 (144,212) |
| Uruguay                  | High           | Default          | 100.0%                | 43.8% (40.5% - 47.7%) | 43.8% (40.5% - 47.7%) | 87 (71,104)             | 87 (71,104)   |
| Uruguay                  | High           | 2 dose threshold | 91.3%                 | 43.8% (40.4% - 47.6%) | 43.8% (40.4% - 47.6%) | 87 (71,104)             | 87 (71,104)   |
| Uruguay                  | High           | 40+ threshold    | 66.0%                 | 43.6% (40.2% - 47.4%) | 43.6% (40.2% - 47.4%) | 86 (71,103)             | 86 (71,103)   |
| Uruguay                  | High           | 65+ threshold    | 57.2%                 | 44.6% (41.5% - 47.9%) | 45.9% (40.5% - 49.3%) | 81 (67,98)              | 82 (66,100)   |
| Uruguay                  | High           | Full sharing     | 53.3%                 | 41.0% (37.9% - 45.5%) | 16.1% (9.8% - 21.4%)  | 71 (58,84)              | 22 (15,27)    |
| Uzbekistan               | Lower middle   | Default          | 13.5%                 | 62.2% (52.6% - 67.7%) | 62.2% (52.6% - 67.7%) | 198 (156,271)           | 198 (156,271) |
| Uzbekistan               | Lower middle   | 2 dose threshold | 26.1%                 | 62.1% (52.6% - 67.6%) | 62.1% (52.6% - 67.6%) | 197 (155,269)           | 197 (155,270) |
| Uzbekistan               | Lower middle   | 40+ threshold    | 42.1%                 | 61.5% (51.8% - 67.1%) | 61.4% (51.8% - 67.1%) | 188 (149,255)           | 188 (148,256) |
| Uzbekistan               | Lower middle   | 65+ threshold    | 51.3%                 | 56.8% (46.5% - 63.8%) | 56.4% (42.4% - 64.3%) | 146 (117,195)           | 144 (115,185) |

| Country    | Income bracket | Strategy         | Proportion vaccinated | Proportion infected   |                       | Mortalities per 100,000 |              |
|------------|----------------|------------------|-----------------------|-----------------------|-----------------------|-------------------------|--------------|
|            |                |                  |                       | unchanged             | adapted               | unchanged               | adapted      |
| Uzbekistan | Lower middle   | Full sharing     | 53.8%                 | 49.5% (37.0% - 60.5%) | 42.3% (33.3% - 51.2%) | 121 (97,159)            | 118 (84,154) |
| Venezuela  | Upper middle   | Default          | 11.8%                 | 26.0% (18.6% - 32.1%) | 26.0% (18.6% - 32.1%) | 25 (20,30)              | 25 (20,30)   |
| Venezuela  | Upper middle   | 2 dose threshold | 24.7%                 | 25.9% (18.6% - 32.1%) | 26.0% (18.6% - 32.1%) | 24 (20,30)              | 25 (20,30)   |
| Venezuela  | Upper middle   | 40+ threshold    | 42.6%                 | 25.5% (18.4% - 31.7%) | 25.5% (18.3% - 31.7%) | 23 (19,28)              | 23 (19,29)   |
| Venezuela  | Upper middle   | 65+ threshold    | 51.7%                 | 21.6% (15.0% - 27.5%) | 26.3% (16.7% - 35.9%) | 17 (14,20)              | 18 (15,23)   |
| Venezuela  | Upper middle   | Full sharing     | 53.8%                 | 16.6% (11.3% - 21.7%) | 10.1% (6.3% - 22.1%)  | 13 (11,15)              | 8 (7,12)     |
| Vietnam    | Lower middle   | Default          | 5.9%                  | 24.8% (20.2% - 30.5%) | 24.8% (20.2% - 30.5%) | 52 (45,61)              | 52 (45,61)   |
| Vietnam    | Lower middle   | 2 dose threshold | 19.3%                 | 24.0% (19.6% - 29.6%) | 24.0% (19.5% - 29.5%) | 51 (44,59)              | 51 (44,59)   |
| Vietnam    | Lower middle   | 40+ threshold    | 39.3%                 | 20.8% (16.6% - 25.8%) | 19.7% (15.9% - 24.5%) | 39 (33,45)              | 39 (34,45)   |
| Vietnam    | Lower middle   | 65+ threshold    | 51.1%                 | 10.9% (8.0% - 15.0%)  | 11.7% (3.9% - 20.3%)  | 11 (9,12)               | 10 (5,14)    |
| Vietnam    | Lower middle   | Full sharing     | 53.6%                 | 3.0% (1.5% - 5.1%)    | 0.1% (0.1% - 0.1%)    | 2 (2,3)                 | 0 (0,0)      |
| Yemen      | Low            | Default          | 1.8%                  | 56.2% (43.3% - 66.9%) | 56.2% (43.3% - 66.9%) | 106 (78,137)            | 106 (78,137) |
| Yemen      | Low            | 2 dose threshold | 15.8%                 | 55.4% (42.7% - 66.0%) | 55.3% (42.7% - 66.0%) | 103 (75,134)            | 103 (75,134) |
| Yemen      | Low            | 40+ threshold    | 36.3%                 | 50.3% (38.6% - 59.9%) | 49.6% (38.1% - 58.8%) | 89 (67,112)             | 89 (67,111)  |
| Yemen      | Low            | 65+ threshold    | 51.9%                 | 43.9% (32.2% - 53.3%) | 43.6% (31.9% - 53.1%) | 77 (60,96)              | 77 (60,95)   |
| Yemen      | Low            | Full sharing     | 54.5%                 | 41.4% (29.9% - 50.5%) | 29.4% (20.1% - 37.5%) | 59 (45,73)              | 44 (32,62)   |
| Zimbabwe   | Lower middle   | Default          | 10.7%                 | 77.4% (68.5% - 84.4%) | 77.4% (68.5% - 84.4%) | 77 (59,100)             | 77 (59,100)  |
| Zimbabwe   | Lower middle   | 2 dose threshold | 23.7%                 | 77.3% (68.4% - 84.3%) | 77.3% (68.4% - 84.3%) | 77 (58,100)             | 77 (58,100)  |
| Zimbabwe   | Lower middle   | 40+ threshold    | 41.8%                 | 76.0% (66.6% - 83.4%) | 76.0% (66.9% - 83.6%) | 73 (55,93)              | 73 (55,93)   |
| Zimbabwe   | Lower middle   | 65+ threshold    | 52.4%                 | 63.2% (51.2% - 73.2%) | 43.5% (36.0% - 50.3%) | 60 (47,76)              | 55 (43,71)   |
| Zimbabwe   | Lower middle   | Full sharing     | 54.8%                 | 47.7% (38.4% - 56.0%) | 34.5% (21.1% - 52.1%) | 51 (39,64)              | 35 (28,44)   |

| Region               | Strategy         | Percentage reduced infection |                    | Percentage reduced mortality |                    |
|----------------------|------------------|------------------------------|--------------------|------------------------------|--------------------|
|                      |                  | unchanged behaviour          | adapted behaviour  | unchanged behaviour          | adapted behaviour  |
| World                | 2 dose threshold | 0.2 (0.2 – 0.3)              | 0.3 (0.3 – 0.4)    | 0.3 (0.2 – 0.3)              | 0.3 (0.3 – 0.3)    |
|                      | 40+ threshold    | -1.8 (-2.1 – -1.5)           | 3.4 (3.0 – 3.7)    | 1.1 (0.9 – 1.4)              | 2.7 (2.5 – 2.9)    |
|                      | 65+ threshold    | 1.9 (1.2 – 2.8)              | 13.5 (12.3 – 15.5) | 8.6 (8.1 – 9.4)              | 13.0 (12.3 – 13.8) |
|                      | Full sharing     | 8.1 (5.9 – 11.4)             | 40.2 (36.9 – 42.0) | 13.3 (12.0 – 14.5)           | 37.3 (33.1 – 39.0) |
| Low income           | 2 dose threshold | 0.4 (0.3 – 0.6)              | 0.4 (0.3 – 0.6)    | 1.0 (0.9 – 1.2)              | 1.0 (0.9 – 1.1)    |
|                      | 40+ threshold    | 3.2 (2.6 – 3.9)              | 3.5 (2.9 – 4.4)    | 9.0 (8.3 – 9.8)              | 9.0 (8.2 – 9.9)    |
|                      | 65+ threshold    | 15.1 (13.6 – 17.6)           | 24.5 (22.4 – 26.5) | 27.3 (25.5 – 29.0)           | 30.5 (28.5 – 33.0) |
|                      | Full sharing     | 25.9 (23.9 – 28.1)           | 41.5 (34.5 – 46.4) | 39.0 (37.3 – 40.8)           | 50.9 (46.7 – 54.2) |
| Lower middle income  | 2 dose threshold | 0.2 (0.2 – 0.3)              | 0.3 (0.2 – 0.3)    | 0.4 (0.4 – 0.4)              | 0.4 (0.3 – 0.4)    |
|                      | 40+ threshold    | 1.7 (1.5 – 1.9)              | 2.0 (1.7 – 2.2)    | 2.7 (2.5 – 2.9)              | 2.7 (2.5 – 3.0)    |
|                      | 65+ threshold    | 6.9 (6.4 – 7.8)              | 9.1 (8.2 – 11.3)   | 13.6 (13.0 – 14.2)           | 14.5 (13.9 – 15.3) |
|                      | Full sharing     | 12.6 (11.0 – 14.5)           | 39.5 (35.4 – 42.3) | 24.7 (24.2 – 25.6)           | 46.1 (40.8 – 48.8) |
| Higher middle income | 2 dose threshold | 0.1 (0.1 – 0.2)              | 0.1 (0.0 – 0.2)    | 0.2 (0.2 – 0.2)              | 0.2 (0.2 – 0.2)    |
|                      | 40+ threshold    | 1.0 (0.8 – 1.4)              | 1.2 (0.9 – 1.8)    | 2.4 (2.1 – 2.7)              | 2.4 (2.1 – 2.8)    |
|                      | 65+ threshold    | 6.4 (4.8 – 8.3)              | 17.9 (15.9 – 20.9) | 11.7 (10.7 – 13.4)           | 15.0 (13.6 – 17.1) |
|                      | Full sharing     | 15.0 (9.5 – 21.6)            | 39.9 (34.8 – 44.5) | 18.7 (16.5 – 20.9)           | 33.3 (27.8 – 36.9) |
| High income          | 2 dose threshold | 0.3 (-0.0 – 0.6)             | 1.1 (0.8 – 1.3)    | 0.0 (-0.0 – 0.1)             | 0.1 (0.1 – 0.1)    |
|                      | 40+ threshold    | -28.2 (-31.3 – -26.5)        | 13.9 (12.6 – 15.4) | -5.2 (-5.7 – -4.4)           | 1.9 (1.5 – 2.2)    |
|                      | 65+ threshold    | -42.4 (-46.9 – -40.0)        | 12.3 (8.8 – 16.1)  | -9.1 (-10.1 – -8.3)          | 3.5 (2.7 – 4.2)    |
|                      | Full sharing     | -42.7 (-45.6 – -38.5)        | 43.9 (32.5 – 48.3) | -22.3 (-23.7 – -20.6)        | 23.0 (13.7 – 26.6) |

**Table S4:** Estimates for reductions in infection and mortality levels taken at the end of 2021 for central vaccine sharing strategies relative to the current scenario. Bracketed values represent a 95% prediction interval.

## 2 Lower level adapted behaviour

In tables S5 and S6 we present data for alternative simulations for scenarios with a lower level of adapted behaviour. As in the central adapted behaviour scenarios, we implement behavioural response by increasing/decreasing the control parameter for each country that is sharing vaccines, dependent on whether the number of active infections is increasing/decreasing (subject to a five day time lag to reflect delays in detection and reaction). However, in these alternative scenarios the control parameter is increased at 50% of the rate of the central scenarios.

| Region               | Strategy         | Proportion vaccinated (2 doses) | Proportion infected   |                               | Mortalities per 100,000 |                               |
|----------------------|------------------|---------------------------------|-----------------------|-------------------------------|-------------------------|-------------------------------|
|                      |                  |                                 | unchanged behaviour   | lower level adapted behaviour | unchanged behaviour     | lower level adapted behaviour |
| World                | Default          | 44.4%                           | 48.4% (47.4% - 49.6%) | 48.4% (47.4% - 49.6%)         | 133.1 (128.2 - 138.3)   | 133.1 (128.2 - 138.3)         |
|                      | 2 dose threshold | 49.6%                           | 48.3% (47.3% - 49.6%) | 48.3% (47.3% - 49.5%)         | 132.7 (127.8 - 137.9)   | 132.8 (127.9 - 137.9)         |
|                      | 40+ threshold    | 49.6%                           | 49.3% (48.2% - 50.6%) | 46.9% (46.0% - 48.0%)         | 131.6 (126.8 - 136.5)   | 129.7 (125.0 - 134.8)         |
|                      | 65+ threshold    | 49.4%                           | 47.5% (46.1% - 49.1%) | 43.3% (41.9% - 44.7%)         | 121.6 (117.7 - 126.5)   | 117.3 (113.6 - 122.0)         |
|                      | Full sharing     | 49.4%                           | 44.4% (42.0% - 46.7%) | 32.6% (31.4% - 34.6%)         | 115.4 (112.5 - 119.3)   | 93.9 (88.2 - 99.4)            |
| Low income           | Default          | 1.7%                            | 64.6% (61.6% - 66.9%) | 64.6% (61.6% - 66.9%)         | 64.0 (59.4 - 70.1)      | 64.0 (59.4 - 70.1)            |
|                      | 2 dose threshold | 11.7%                           | 64.3% (61.3% - 66.6%) | 64.3% (61.4% - 66.6%)         | 63.4 (58.8 - 69.3)      | 63.4 (58.8 - 69.5)            |
|                      | 40+ threshold    | 26.9%                           | 62.5% (59.4% - 64.8%) | 62.4% (59.4% - 64.9%)         | 58.3 (53.9 - 63.9)      | 58.4 (54.2 - 63.9)            |
|                      | 65+ threshold    | 38.7%                           | 54.7% (51.5% - 57.2%) | 50.2% (47.6% - 52.9%)         | 46.5 (43.4 - 49.8)      | 44.8 (42.1 - 47.9)            |
|                      | Full sharing     | 40.7%                           | 47.8% (45.2% - 50.7%) | 43.5% (38.7% - 47.8%)         | 39.1 (36.5 - 41.5)      | 34.8 (31.5 - 37.9)            |
| Lower middle income  | Default          | 18.4%                           | 65.4% (63.2% - 68.1%) | 65.4% (63.2% - 68.1%)         | 155.8 (144.2 - 169.7)   | 155.8 (144.2 - 169.7)         |
|                      | 2 dose threshold | 28.5%                           | 65.2% (63.1% - 67.9%) | 65.2% (63.1% - 67.9%)         | 155.2 (143.6 - 169.1)   | 155.2 (143.6 - 169.2)         |
|                      | 40+ threshold    | 39.4%                           | 64.2% (61.9% - 66.9%) | 64.2% (62.1% - 66.7%)         | 151.5 (139.9 - 165.5)   | 151.7 (140.1 - 165.8)         |
|                      | 65+ threshold    | 46.2%                           | 60.8% (58.2% - 63.6%) | 60.2% (57.6% - 63.2%)         | 134.6 (124.1 - 148.0)   | 134.1 (123.8 - 146.9)         |
|                      | Full sharing     | 47.4%                           | 57.1% (54.0% - 60.4%) | 43.8% (41.8% - 46.4%)         | 117.1 (107.9 - 128.9)   | 91.9 (81.7 - 103.2)           |
| Higher middle income | Default          | 66.0%                           | 33.8% (32.5% - 34.7%) | 33.8% (32.5% - 34.7%)         | 105.9 (100.3 - 113.0)   | 105.9 (100.3 - 113.0)         |
|                      | 2 dose threshold | 66.1%                           | 33.8% (32.5% - 34.7%) | 33.8% (32.5% - 34.7%)         | 105.7 (100.1 - 112.8)   | 105.7 (100.2 - 112.8)         |
|                      | 40+ threshold    | 56.6%                           | 33.5% (32.1% - 34.5%) | 33.5% (32.2% - 34.4%)         | 103.4 (98.1 - 110.0)    | 103.5 (98.3 - 110.5)          |
|                      | 65+ threshold    | 51.6%                           | 31.7% (29.9% - 32.9%) | 29.1% (27.9% - 30.2%)         | 93.4 (89.0 - 98.5)      | 91.0 (87.0 - 95.4)            |
|                      | Full sharing     | 51.4%                           | 28.6% (25.6% - 31.0%) | 22.8% (21.3% - 24.7%)         | 86.0 (81.8 - 90.0)      | 78.4 (74.3 - 83.4)            |
| High income          | Default          | 75.3%                           | 35.7% (34.5% - 36.7%) | 35.7% (34.5% - 36.7%)         | 162.9 (155.7 - 168.9)   | 162.9 (155.7 - 168.9)         |
|                      | 2 dose threshold | 78.8%                           | 35.6% (34.4% - 36.6%) | 35.3% (34.2% - 36.4%)         | 162.9 (155.7 - 168.9)   | 162.8 (155.6 - 168.8)         |
|                      | 40+ threshold    | 68.5%                           | 45.7% (44.5% - 47.0%) | 31.0% (30.3% - 31.6%)         | 171.3 (164.1 - 177.6)   | 160.1 (152.8 - 165.8)         |
|                      | 65+ threshold    | 57.3%                           | 50.9% (49.8% - 52.0%) | 34.2% (32.0% - 37.2%)         | 177.8 (170.2 - 184.8)   | 160.3 (153.5 - 166.9)         |
|                      | Full sharing     | 53.6%                           | 50.8% (48.5% - 52.4%) | 24.7% (21.8% - 30.4%)         | 199.1 (190.4 - 208.0)   | 149.5 (134.6 - 169.4)         |

**Table S5:** Estimates for vaccination coverage, proportion infected and mortality rates (per 100,000) for each income group for strategies with a lower level of behaviour adaptation than in the central scenarios. All values are taken at the start of 2022. Bracketed values represent a 95% prediction interval, proportion vaccinated is deterministic and so an interval is not provided.

| Region               | Strategy         | Percentage reduced infection |                               | Percentage reduced mortality |                               |
|----------------------|------------------|------------------------------|-------------------------------|------------------------------|-------------------------------|
|                      |                  | unchanged behaviour          | lower level adapted behaviour | unchanged behaviour          | lower level adapted behaviour |
| World                | 2 dose threshold | 0.2 (0.2 – 0.3)              | 0.3 (0.2 – 0.4)               | 0.3 (0.2 – 0.3)              | 0.3 (0.2 – 0.3)               |
|                      | 40+ threshold    | -1.8 (-2.1 – -1.5)           | 3.1 (2.7 – 3.5)               | 1.1 (0.9 – 1.4)              | 2.5 (2.4 – 2.8)               |
|                      | 65+ threshold    | 1.9 (1.2 – 2.8)              | 10.5 (9.2 – 12.3)             | 8.6 (8.1 – 9.4)              | 11.9 (11.0 – 13.0)            |
|                      | Full sharing     | 8.1 (5.9 – 11.4)             | 32.9 (29.5 – 35.4)            | 13.3 (12.0 – 14.5)           | 29.9 (25.0 – 32.1)            |
| Low income           | 2 dose threshold | 0.4 (0.3 – 0.6)              | 0.4 (0.2 – 0.5)               | 1.0 (0.9 – 1.2)              | 1.0 (0.8 – 1.1)               |
|                      | 40+ threshold    | 3.2 (2.6 – 3.9)              | 3.4 (2.5 – 4.2)               | 9.0 (8.3 – 9.8)              | 8.8 (7.7 – 9.6)               |
|                      | 65+ threshold    | 15.1 (13.6 – 17.6)           | 22.2 (20.1 – 24.7)            | 27.3 (25.5 – 29.0)           | 30.1 (28.0 – 32.4)            |
|                      | Full sharing     | 25.9 (23.9 – 28.1)           | 32.5 (27.3 – 38.9)            | 39.0 (37.3 – 40.8)           | 45.6 (41.6 – 49.7)            |
| Lower middle income  | 2 dose threshold | 0.2 (0.2 – 0.3)              | 0.2 (0.2 – 0.3)               | 0.4 (0.4 – 0.4)              | 0.4 (0.3 – 0.4)               |
|                      | 40+ threshold    | 1.7 (1.5 – 1.9)              | 1.9 (1.5 – 2.1)               | 2.7 (2.5 – 2.9)              | 2.6 (2.4 – 2.9)               |
|                      | 65+ threshold    | 6.9 (6.4 – 7.8)              | 7.7 (7.0 – 9.5)               | 13.6 (13.0 – 14.2)           | 13.9 (13.2 – 14.6)            |
|                      | Full sharing     | 12.6 (11.0 – 14.5)           | 33.1 (29.5 – 36.8)            | 24.7 (24.2 – 25.6)           | 41.5 (36.4 – 44.6)            |
| Higher middle income | 2 dose threshold | 0.1 (0.1 – 0.2)              | 0.1 (-0.0 – 0.2)              | 0.2 (0.2 – 0.2)              | 0.2 (0.1 – 0.2)               |
|                      | 40+ threshold    | 1.0 (0.8 – 1.4)              | 1.0 (0.7 – 1.6)               | 2.4 (2.1 – 2.7)              | 2.2 (2.0 – 2.6)               |
|                      | 65+ threshold    | 6.4 (4.8 – 8.3)              | 13.8 (11.8 – 16.1)            | 11.7 (10.7 – 13.4)           | 13.9 (12.5 – 15.8)            |
|                      | Full sharing     | 15.0 (9.5 – 21.6)            | 33.2 (27.4 – 36.2)            | 18.7 (16.5 – 20.9)           | 25.9 (22.8 – 29.3)            |
| High income          | 2 dose threshold | 0.3 (-0.0 – 0.6)             | 1.0 (0.6 – 1.2)               | 0.0 (-0.0 – 0.1)             | 0.1 (-0.0 – 0.1)              |
|                      | 40+ threshold    | -28.2 (-31.3 – -26.5)        | 13.1 (11.4 – 14.7)            | -5.2 (-5.7 – -4.4)           | 1.7 (1.4 – 2.0)               |
|                      | 65+ threshold    | -42.4 (-46.9 – -40.0)        | 4.9 (-6.2 – 10.6)             | -9.1 (-10.1 – -8.3)          | 1.6 (-0.5 – 3.0)              |
|                      | Full sharing     | -42.7 (-45.6 – -38.5)        | 32.1 (15.4 – 39.3)            | -22.3 (-23.7 – -20.6)        | 9.0 (-4.7 – 17.1)             |

**Table S6:** Estimates for reductions in infection and mortality levels taken at the end of 2021 relative to the current scenario, with alternative lower level adapted behaviour. Bracketed values represent a 95% prediction interval.

### **3 Age biased sharing strategies**

In tables S7 and S8 we present data for alternative strategies where vaccine redistribution is age biased, dependent on the number of unvaccinated individuals in each 5 year age bracket weighted by vulnerability (in the central scenarios vaccine redistribution is unweighted, proportional to the size of the eligible adult population of each country that is as yet unvaccinated).



| Region               | Strategy         | Proportion vaccinated (2 doses) | Proportion infected              |                                | Mortalities per 100,000          |                                |
|----------------------|------------------|---------------------------------|----------------------------------|--------------------------------|----------------------------------|--------------------------------|
|                      |                  |                                 | unchanged behaviour (age biased) | adapted behaviour (age biased) | unchanged behaviour (age biased) | adapted behaviour (age biased) |
| World                | Default          | 44.4%                           | 48.4% (47.4% - 49.6%)            | 48.4% (47.4% - 49.6%)          | 133.1 (128.2 - 138.3)            | 133.1 (128.2 - 138.3)          |
|                      | 2 dose threshold | 49.4%                           | 48.4% (47.3% - 49.6%)            | 48.3% (47.3% - 49.5%)          | 132.8 (127.8 - 137.9)            | 132.8 (127.8 - 137.9)          |
|                      | 40+ threshold    | 49.2%                           | 49.5% (48.4% - 50.6%)            | 46.8% (45.8% - 48.0%)          | 131.7 (127.0 - 136.7)            | 129.5 (124.6 - 134.4)          |
|                      | 65+ threshold    | 49.0%                           | 48.0% (46.6% - 49.4%)            | 42.2% (40.8% - 43.7%)          | 123.0 (119.1 - 127.8)            | 117.1 (113.1 - 122.1)          |
|                      | Full sharing     | 48.9%                           | 46.8% (45.3% - 48.5%)            | 29.6% (28.2% - 31.6%)          | 119.8 (116.2 - 124.5)            | 85.5 (81.1 - 90.5)             |
| Low income           | Default          | 1.7%                            | 64.6% (61.6% - 66.9%)            | 64.6% (61.6% - 66.9%)          | 64.0 (59.4 - 70.1)               | 64.0 (59.4 - 70.1)             |
|                      | 2 dose threshold | 12.0%                           | 64.3% (61.3% - 66.6%)            | 64.3% (61.3% - 66.6%)          | 63.5 (58.9 - 69.6)               | 63.5 (58.9 - 69.6)             |
|                      | 40+ threshold    | 25.8%                           | 62.8% (59.8% - 65.3%)            | 62.5% (59.5% - 64.9%)          | 59.2 (54.9 - 65.1)               | 59.2 (54.9 - 65.2)             |
|                      | 65+ threshold    | 29.7%                           | 57.9% (55.0% - 60.5%)            | 52.5% (49.8% - 54.9%)          | 49.7 (46.4 - 53.6)               | 47.6 (44.3 - 50.8)             |
|                      | Full sharing     | 29.8%                           | 55.1% (52.1% - 57.7%)            | 38.6% (34.0% - 43.4%)          | 44.9 (42.1 - 48.0)               | 33.5 (30.0 - 36.9)             |
| Lower middle income  | Default          | 18.4%                           | 65.4% (63.2% - 68.1%)            | 65.4% (63.2% - 68.1%)          | 155.8 (144.2 - 169.7)            | 155.8 (144.2 - 169.7)          |
|                      | 2 dose threshold | 27.8%                           | 65.2% (63.1% - 67.9%)            | 65.2% (63.1% - 67.9%)          | 155.2 (143.7 - 169.2)            | 155.2 (143.7 - 169.2)          |
|                      | 40+ threshold    | 39.6%                           | 64.2% (61.9% - 66.9%)            | 64.1% (61.8% - 66.7%)          | 151.8 (140.3 - 165.8)            | 151.8 (140.0 - 165.9)          |
|                      | 65+ threshold    | 41.4%                           | 61.7% (59.2% - 64.5%)            | 59.8% (57.1% - 62.5%)          | 137.8 (127.0 - 151.3)            | 135.9 (125.5 - 148.9)          |
|                      | Full sharing     | 41.4%                           | 60.4% (57.9% - 63.2%)            | 41.0% (38.9% - 43.7%)          | 128.9 (118.6 - 141.3)            | 88.8 (79.1 - 98.9)             |
| Higher middle income | Default          | 66.0%                           | 33.8% (32.5% - 34.7%)            | 33.8% (32.5% - 34.7%)          | 105.9 (100.3 - 113.0)            | 105.9 (100.3 - 113.0)          |
|                      | 2 dose threshold | 66.1%                           | 33.8% (32.5% - 34.7%)            | 33.8% (32.5% - 34.7%)          | 105.7 (100.1 - 112.8)            | 105.7 (100.2 - 112.8)          |
|                      | 40+ threshold    | 56.1%                           | 33.5% (32.2% - 34.4%)            | 33.4% (32.1% - 34.4%)          | 103.3 (98.0 - 110.0)             | 103.3 (98.0 - 109.8)           |
|                      | 65+ threshold    | 54.2%                           | 32.0% (30.5% - 33.2%)            | 27.7% (26.4% - 28.8%)          | 94.4 (89.8 - 99.9)               | 90.2 (85.9 - 94.9)             |
|                      | Full sharing     | 54.1%                           | 31.1% (29.3% - 32.6%)            | 20.5% (18.4% - 23.0%)          | 89.8 (85.7 - 95.1)               | 71.0 (65.9 - 76.7)             |
| High income          | Default          | 75.3%                           | 35.7% (34.5% - 36.7%)            | 35.7% (34.5% - 36.7%)          | 162.9 (155.7 - 168.9)            | 162.9 (155.7 - 168.9)          |
|                      | 2 dose threshold | 78.8%                           | 35.7% (34.5% - 36.7%)            | 35.4% (34.2% - 36.4%)          | 162.8 (155.6 - 168.7)            | 162.6 (155.5 - 168.6)          |
|                      | 40+ threshold    | 67.2%                           | 46.5% (45.1% - 47.7%)            | 30.6% (29.9% - 31.3%)          | 171.3 (164.2 - 177.4)            | 158.7 (151.4 - 164.4)          |
|                      | 65+ threshold    | 64.1%                           | 48.9% (47.8% - 49.9%)            | 30.8% (29.6% - 31.9%)          | 175.4 (167.7 - 182.2)            | 156.1 (149.2 - 161.7)          |
|                      | Full sharing     | 63.9%                           | 48.3% (47.3% - 49.2%)            | 20.6% (18.7% - 23.8%)          | 188.1 (179.6 - 196.2)            | 125.4 (118.0 - 137.9)          |

**Table S7:** Estimates for vaccination coverage, proportion infected and mortality rates (per 100,000) for each income group for age biased sharing strategies. All values are taken at the start of 2022. Bracketed values represent a 95% prediction interval, proportion vaccinated is deterministic and so an interval is not provided.

| Region                     | Strategy<br>(age biased) | Percentage reduced infection        |                                   | Percentage reduced mortality        |                                   |
|----------------------------|--------------------------|-------------------------------------|-----------------------------------|-------------------------------------|-----------------------------------|
|                            |                          | unchanged behaviour<br>(age biased) | adapted behaviour<br>(age biased) | unchanged behaviour<br>(age biased) | adapted behaviour<br>(age biased) |
| World                      | 2 dose threshold         | 0.2 (0.1 – 0.3)                     | 0.3 (0.2 – 0.4)                   | 0.3 (0.2 – 0.3)                     | 0.3 (0.2 – 0.3)                   |
|                            | 40+ threshold            | -2.1 (-2.4 – -1.8)                  | 3.3 (3.0 – 3.7)                   | 1.0 (0.8 – 1.3)                     | 2.8 (2.5 – 3.0)                   |
|                            | 65+ threshold            | 1.0 (0.5 – 1.8)                     | 12.7 (11.6 – 14.4)                | 7.6 (7.1 – 8.3)                     | 12.0 (11.3 – 12.8)                |
|                            | Full sharing             | 3.4 (2.5 – 4.5)                     | 39.0 (36.1 – 41.2)                | 10.0 (9.2 – 10.8)                   | 36.1 (32.5 – 38.2)                |
| Low<br>income              | 2 dose threshold         | 0.4 (0.2 – 0.5)                     | 0.4 (0.3 – 0.5)                   | 0.8 (0.6 – 0.9)                     | 0.8 (0.7 – 0.9)                   |
|                            | 40+ threshold            | 2.7 (2.2 – 3.3)                     | 3.2 (2.5 – 3.9)                   | 7.5 (6.9 – 8.5)                     | 7.6 (6.7 – 8.5)                   |
|                            | 65+ threshold            | 10.1 (9.0 – 11.7)                   | 18.6 (16.8 – 21.3)                | 22.4 (20.6 – 24.0)                  | 25.6 (23.8 – 27.6)                |
|                            | Full sharing             | 14.3 (12.8 – 17.3)                  | 40.5 (33.8 – 46.2)                | 29.9 (28.5 – 31.5)                  | 47.7 (41.4 – 52.3)                |
| Lower<br>middle<br>income  | 2 dose threshold         | 0.3 (0.2 – 0.3)                     | 0.3 (0.2 – 0.3)                   | 0.3 (0.3 – 0.4)                     | 0.3 (0.3 – 0.4)                   |
|                            | 40+ threshold            | 1.8 (1.5 – 2.0)                     | 2.0 (1.7 – 2.2)                   | 2.6 (2.4 – 2.8)                     | 2.6 (2.3 – 2.9)                   |
|                            | 65+ threshold            | 5.6 (5.2 – 6.4)                     | 8.3 (7.7 – 10.5)                  | 11.5 (11.0 – 12.2)                  | 12.7 (12.1 – 13.5)                |
|                            | Full sharing             | 7.5 (6.9 – 8.6)                     | 37.6 (34.2 – 40.6)                | 17.2 (16.6 – 18.0)                  | 43.6 (37.8 – 46.5)                |
| Higher<br>middle<br>income | 2 dose threshold         | 0.1 (0.0 – 0.2)                     | 0.1 (0.0 – 0.2)                   | 0.2 (0.2 – 0.2)                     | 0.2 (0.2 – 0.2)                   |
|                            | 40+ threshold            | 1.0 (0.8 – 1.3)                     | 1.2 (0.9 – 1.8)                   | 2.4 (2.2 – 2.8)                     | 2.5 (2.2 – 2.9)                   |
|                            | 65+ threshold            | 5.2 (4.1 – 6.9)                     | 18.2 (16.0 – 20.1)                | 10.8 (9.8 – 12.2)                   | 14.6 (13.2 – 16.7)                |
|                            | Full sharing             | 8.0 (5.9 – 10.4)                    | 40.0 (32.5 – 43.7)                | 15.1 (13.8 – 16.7)                  | 33.0 (27.6 – 37.1)                |
| High<br>income             | 2 dose threshold         | -0.0 (-0.4 – 0.1)                   | 0.7 (0.5 – 1.0)                   | 0.1 (0.0 – 0.1)                     | 0.2 (0.1 – 0.2)                   |
|                            | 40+ threshold            | -30.3 (-33.7 – -28.0)               | 14.2 (12.9 – 15.8)                | -5.2 (-5.8 – -4.3)                  | 2.6 (2.3 – 2.8)                   |
|                            | 65+ threshold            | -36.9 (-40.3 – -35.1)               | 13.3 (10.2 – 17.3)                | -7.6 (-8.5 – -6.8)                  | 4.1 (3.5 – 4.9)                   |
|                            | Full sharing             | -35.1 (-39.2 – -33.3)               | 43.1 (32.6 – 47.1)                | -15.5 (-16.8 – -14.1)               | 23.4 (16.6 – 27.4)                |

**Table S8:** Estimates for reductions in infection and mortality levels taken at the end of 2021 for age biased vaccine sharing strategies relative to the current scenario. Bracketed values represent a 95% prediction interval.
